1 **Systematics of a radiation of Neotropical suboscines (Aves: Thamnophilidae: *Epinecrophylla*)**

2

3 Oscar Johnson<sup>a\*</sup>, Jeffrey T. Howard<sup>a,b</sup>, & Robb T. Brumfield<sup>a</sup>

4

5 <sup>a</sup> *Department of Biological Sciences and Museum of Natural Science, Louisiana State University,*

6 *Baton Rouge, LA 70803, USA*

7 <sup>b</sup> *Present address: Louisiana State University Health Sciences Center Shreveport, Shreveport, LA*

8 *71103, USA*

9

10 \* Corresponding author

11

12 Email addresses: [ojohns7@lsu.edu](mailto:ojohns7@lsu.edu)\* (Oscar Johnson), [jtylerh12@gmail.com](mailto:jtylerh12@gmail.com) (Jeffrey T. Howard),

13 [robb@lsu.edu](mailto:robb@lsu.edu) (Robb T. Brumfield).

14

15

16

17

18

19

20

21

22

## 23 **Abstract**

24 The stipple-throated antwrens of the genus *Epinecrophylla* (Aves: Thamnophilidae) are  
25 represented by eight species primarily found in the lowlands of the Amazon Basin and the  
26 Guiana Shield. The genus has a long and convoluted taxonomic history, with many attempts  
27 made to address the taxonomy and systematics of the group. Here we employ massively  
28 parallel sequencing of thousands of ultraconserved elements (UCEs) to provide both the most  
29 comprehensive subspecies-level phylogeny of *Epinecrophylla* antwrens and the first population-  
30 level genetic analyses for most species in the genus. Most of our analyses are robust to a  
31 diversity of phylogenetic and population genetic methods, but we show that even with  
32 thousands of loci we are unable to confidently place the western Amazonian taxon *pyrrhonota*.  
33 We uncovered phylogenetic relationships between taxa and patterns of population structure  
34 that are discordant with both morphology and current taxonomy. For example, we found deep  
35 genetic breaks between taxa in the *ornata* group currently regarded as species, and in the  
36 *haematonota* and *leucophthalma* groups we found paraphyly at the species and subspecies  
37 levels, respectively. Our population genetics analyses showed extensive admixture between  
38 some taxa despite their deep genetic divergence. We present a revised taxonomy for the group,  
39 discuss the biogeographic patterns that we uncover, and suggest areas for further study.

40

41 **Keywords:** Systematics, Ultraconserved elements, Phylogenomics, *Epinecrophylla*, Amazonia

42

## 43 **1. Introduction**

44           The stipple-throated antwrens of the genus *Epinecrophylla* (Isler et al. 2006; Aves:  
45   Thamnophilidae) are represented by 21 currently recognized taxa, eight of which are  
46   considered species (*E. fulviventris*, *E. ornata*, *E. erythrura*, *E. leucophthalma*, *E. gutturalis*, *E.*  
47   *amazonica*, *E. spodionota*, and *E. haematonota*; Figure 1). These species are primarily found in  
48   the lowlands of the Amazon Basin and the Guiana Shield, with one (*E. fulviventris*) found west  
49   of the Andes from Ecuador to Honduras (Clements et al., 2019; Zimmer and Isler, 2003). All  
50   species are small, insectivorous dead-leaf foraging specialists, typically found in pairs or small  
51   family groups in tropical upland forest (Remsen and Parker, 1984; Wiley, 1971). The genus  
52   reaches its greatest diversity in the western Amazon Basin, with up to three species broadly co-  
53   occurring in most regions, despite similar plumage and foraging behavior between species  
54   (Remsen and Parker, 1984; Zimmer and Isler, 2003).

55           Multiple attempts have been made to resolve relationships in the genus with molecular  
56   data, with increasing numbers of loci and individuals used (Hackett and Rosenberg, 1990;  
57   Harvey et al., in press; Whitney et al., 2013). Long considered to be in the genus *Myrmotherula*,  
58   early molecular work using protein electrophoresis provided the first indication that the stipple-  
59   throated antwren complex was not a close relative of other *Myrmotherula* antwrens (Hackett  
60   and Rosenberg, 1990). This was further supported with Sanger sequencing of mitochondrial and  
61   nuclear loci (Bravo et al., 2014; Brumfield et al., 2007; Irestedt et al. 2004), with the studies  
62   finding that *Epinecrophylla* was most closely related to bushbirds in the genera *Neoctantes* and  
63   *Clytoctantes*. This work led to the naming of a new genus for the group, *Epinecrophylla* (Isler et  
64   al., 2006), with *E. haematonota* as the type species. Some authorities changed the common

65 names of *Epinecrophylla* antwrens to stipplethroats (Clements et al., 2019; Remsen et al., 2019)  
66 to reflect this taxonomic rearrangement.

67

### 68 *1.1 History of taxa within Epinecrophylla*

69

70 The species-level taxonomy of the genus has undergone considerable rearrangement  
71 through history (Cory and Hellmayr, 1924; Isler and Whitney, 2018; Peters, 1951; Whitney et  
72 al., 2013; Zimmer, 1932a; 1932b), particularly in the *haematonota* and *leucophthalma* groups.  
73 Early authors (e.g. Cory and Hellmayr, 1924) considered *E. haematonota* to include as  
74 subspecies the taxa *pyrrhonota* and *amazonica* and placed both *spodionota* and *sororia* as  
75 subspecies of *E. leucophthalma*, largely based on back color (rufous in the former three taxa,  
76 brown in the latter three). Using this same reasoning, Todd (1927), when describing the rufous-  
77 backed form *phaeonota*, treated it as a subspecies of *E. haematonota*, but considered *E.*  
78 *amazonica* a species distinct from all other forms. Zimmer (1932a), however, noted that back  
79 color may not be a valid species-level character and transferred *amazonica*, *spodionota*, and  
80 *sororia* to *E. haematonota*, and *phaeonota* to *E. leucophthalma*. Zimmer (1932a) suggested the  
81 possibility of species rank for the rufous-backed taxon *phaeonota*, but also noted intermediate  
82 individuals between it and the adjacent brown-backed taxa *leucophthalma* and *sordida*. This  
83 treatment was maintained by most authors (e.g. Meyer de Schauensee, 1970; Peters, 1951)  
84 until Parker and Remsen (1987) recognized *E. spodionota* (including *sororia*) as a separate  
85 species. This taxonomic treatment was augmented by the recent discovery of two range-  
86 restricted taxa in the group; *E. fjeldsaai* of eastern Ecuador (Krabbe et al., 1999) and *E. dentei* of

87 the Aripuanã-Machado region of Brazil (Whitney et al., 2013), each described as a new species.  
88 In describing *E. dentei* Whitney et al. (2013) also estimated a mitochondrial phylogeny of the  
89 genus, including samples of most taxa, in which they found *ffeldsaai* was phylogenetically  
90 embedded within *haematonota*. Based on that work and the mitochondrial distance between  
91 taxa, Remsen et al. (2019) separated *E. haematonota* into four species: *E. ffeldsaai* (based on  
92 morphology), *E. pyrrhonota*, *E. haematonota*, and *E. amazonica* (including *dentei*), whereas  
93 other authors united *pyrrhonota*, *amazonica*, and *dentei* under *E. haematonota* while  
94 maintaining *E. ffeldsaai* as a distinct species (Dickinson and Christidis, 2014). Since then, Isler  
95 and Whitney (2018) conducted a thorough analysis of the vocalizations of *haematonota*,  
96 *ffeldsaai*, and *pyrrhonota* in which they found no vocal differences among the three taxa,  
97 leading to the recognition of the latter two taxa as subspecies of the former (Remsen et al.,  
98 2019).

99         Within *E. ornata*, the gray-backed Peruvian taxon *atrogularis* was long considered a  
100 separate species, leaving the rufous-backed forms *saturata* and *hoffmannsi* as subspecies of *E.*  
101 *ornata* (Cory and Hellmayr, 1924). This treatment was maintained until Zimmer (1932b)  
102 described the gray-backed *meridionalis* as a subspecies and united all five taxa in the group  
103 under the species *E. ornata*. This is the current treatment of most recent authors (Clements et  
104 al., 2019; Dickinson and Christidis, 2014; Remsen et al., 2019), although del Hoyo et al. (2019)  
105 consider *E. hoffmannsi* a species separate from the rest of *E. ornata* based primarily on the  
106 female plumage and minor vocal differences.

107         The taxonomy of the remainder of the genus has remained rather more stable through  
108 time, with the three other species *E. fulviventris*, *E. gutturalis*, and *E. erythrura*, all largely

109 considered independent species by most authors. *E. erythrura* and *E. leucophthalma* are  
110 currently considered polytypic, while the four taxa described in *E. fulviventris* are generally  
111 considered synonyms of the nominate subspecies (Cory and Hellmayr, 1924; Zimmer and Isler,  
112 2003). We here follow the taxonomy of the South American Classification Committee (Remsen  
113 et al., 2019) and make taxonomic recommendations in light of the Biological Species Concept  
114 (de Queiroz, 2007; Mayr, 1942).

115  
116       Much of the previous molecular work in *Epinecrophylla* has relied upon mitochondrial  
117 sequence data, although a recent phylogenomic study of all suboscine passerine birds included  
118 1-2 samples of each species of *Epinecrophylla* using sequence capture of ultraconserved  
119 elements (UCEs) and recovered a well-resolved topology for the genus (Harvey et al., in press).  
120 Here we expand on the previous genetic work in the genus, addressing the systematics of the  
121 group with both next-generation sequencing of thousands of nuclear loci and draft  
122 mitochondrial genomes, and population-level sampling of most taxa. *Epinecrophylla* provide a  
123 unique system in which to study speciation in the Amazon Basin due to their high species  
124 diversity, documented phenotypic hybrid zones, and multiple broadly sympatric species. Our  
125 expanded sampling both of individuals and loci provides the most in-depth view of the  
126 evolutionary history, species limits, population structure, and introgression between taxa in this  
127 group.

128

## 129 **2. Methods**

130

131 2.1. Sampling

132

133 We obtained a total of 66 *Epinecrophylla* and three outgroup samples representing 18  
134 of the 21 widely recognized taxa in the genus and all currently recognized species. Missing  
135 ingroup taxa are *E. o. ornata*, *E. o. saturata*, and *E. leucophthalma dissita*. The outgroup species  
136 we used are *Myrmorchilus strigilatus*, *Neoctantes niger*, and *Clytoctantes atrogularis*. When  
137 available, we obtained samples from across the geographic range of each *Epinecrophylla* taxon,  
138 with one sample chosen per geographic locality. Fifty-three tissue samples were obtained from  
139 vouchered specimens housed at museums in the United States, with sequence data for the  
140 remaining 16 samples obtained from Harvey et al. (in press; Table 1).

141 We extracted total DNA from the 53 tissue samples using ca. 25 mg of pectoral muscle  
142 with a Qiagen DNeasy Blood and Tissue Kit (Qiagen; Hilden, Germany) and quantified DNA  
143 concentration using a Qubit 2.0 fluorometer (Life Technologies Corporation; Carlsbad, CA).  
144 Samples were standardized to 10 ng/uL. We then sheared samples to approximately 600 base  
145 pair (bp) fragments with an Episonic 1100 bioprocessor (EpiGentek; Farmingdale, NY) and  
146 assessed fragment length using a High Sensitivity DNA Assay on an Agilent 2100 Bioanalyzer  
147 (Agilent Technologies; Santa Clara, CA). We generated DNA libraries using a KAPA Biosystems  
148 Hyper Prep kit (Wilmington, Massachusetts, USA) and enriched UCEs using a set of 5,742  
149 probes that target 5,060 loci in vertebrates (“Tetrapods-UCE-5Kv1”; uce-5k-probes.fasta)  
150 following the protocol of Faircloth et al. (2012). Enriched samples were pooled at equimolar  
151 ratios and paired-end sequencing was conducted on one lane of a HiSeq 3000 sequencer at  
152 Oklahoma Medical Research Foundation Clinical Genomics Center (OMRF; Oklahoma City,

153 Oklahoma, USA). The sequencing lane contained DNA libraries used in other projects. The 16  
154 samples obtained from Harvey et al. (in press) were enriched using a custom probe set  
155 consisting of 2,500 vertebrate UCEs and 96 exons.

156

## 157 *2.2. Contig assembly*

158

159 OMRF demultiplexed sequence reads using custom scripts. We trimmed raw reads of  
160 adapter contamination and low-quality bases using illumiprocessor (Faircloth, 2013) and  
161 trimmomatic (Bolger et al., 2014) with default settings. We then subsampled all read files to 2  
162 million reads per individual to decrease computation time for contig assembly and to normalize  
163 assemblies across samples. Read data were assembled with Itero ([https://github.com/faircloth-](https://github.com/faircloth-lab/itero)  
164 [lab/itero](https://github.com/faircloth-lab/itero)). Because samples were sequenced with two different probe sets, we opted to match  
165 contigs to the “Tetrapods-UCE-2.5Kv1” (`uce-2.5k-probes.fasta`) probe set which consists of  
166 2,560 baits targeting 2,386 UCE loci, and is a subset of the other probe sets used in sequencing.  
167 For the samples sequenced with the “Tetrapods-UCE-5Kv1” probe set, we also separately  
168 matched assembled contigs to this probe set.

169

## 170 *2.3. Sample identification and locus filtering*

171

172 To confirm the identifications of samples we used the Phyluce 1.6.7 (Faircloth, 2015)  
173 tool *match\_contigs\_to\_barcodes* to match contigs from each sample to a mitochondrial  
174 Cytochrome c oxidase subunit I (COI) barcode sequence of *Epinecrophylla pyrrhonota* obtained



175 from GenBank (JN801852.1) and map those contigs against the Barcode of Life Database (BOLD;  
176 Ratnasingham and Hebert, 2007). We then used the Phyluce 1.6.7 (Faircloth, 2015) tool  
177 *get\_trinity\_coverage* to calculate per-locus read coverage for all contigs matching either UCE  
178 and mitochondrial loci. Three samples contained mitochondrial loci with high coverage (>30x)  
179 that matched the incorrect species in BOLD, suggesting either sample misidentification or high  
180 levels of contamination, and were eliminated from our dataset (Table S1). Nine additional  
181 samples contained high-coverage mitochondrial contigs matching the expected species in  
182 BOLD, but with a small number of low-coverage mitochondrial contigs matching the incorrect  
183 species. We used the maximum coverage of 8.05x of these potentially contaminated low-  
184 coverage mitochondrial contigs as a filter and removed all UCE contigs across all samples that  
185 had an average read depth below this threshold.

186

#### 187 2.4. Mitochondrial genome assembly

188

189 We used off-target reads from the UCE sequencing to assemble draft mitochondrial  
190 genomes. We assembled mitochondrial genomes in MITObim 1.9 (Hanh et al., 2013), which is a  
191 Perl wrapper for MIRA 4.0.2 (Chevreux et al., 1999), using as a reference the complete  
192 mitochondrial genome of *Myrmoderus loricatus* (G. Bravo, unpublished data) and the *--quick*  
193 option. We annotated the assembled mitochondrial genomes using the MITOchondrial genome  
194 annotation Server (MITOS) 2 (Bernt et al., 2013) and aligned the 13 mitochondrial protein  
195 coding genes in MAFFT (Katoh et al., 2002) implemented in Geneious 10.2.3  
196 (<https://www.geneious.com>) to create a final partitioned draft mitogenome alignment.

197

198 *2.5. Nuclear locus phasing, alignment, and SNP calling*

199

200 To phase UCE loci we selected as a reference the individual from our sampling that  
201 contained the greatest number of UCE loci after filtering; *Epinecrophylla leucophthalma*  
202 LSUMNS 42670. We phased UCE loci using the *seqcap\_pop* pipeline  
203 ([https://github.com/mgharvey/seqcap\\_pop](https://github.com/mgharvey/seqcap_pop); Faircloth, 2015; Harvey et al., 2016) to obtain a  
204 Single Nucleotide Polymorphism (SNP) dataset and followed Andermann et al. (2019) to  
205 obtained phased alignments. The *seqcap\_pop* pipeline utilizes tools from the Phyluce package  
206 (Faircloth, 2015), SAMtools 0.1.19 (Li et al., 2009), Picard (Broad Institute, Cambridge, MA),  
207 BWA 0.7.17 (Li and Durbin, 2009), and GATK 3.3.0 (McKenna et al., 2010) to process next-  
208 generation sequence data for population-level genetic analyses. Briefly, *seqcap\_pop* maps  
209 sequencing reads to the reference individual to obtain a pileup, adds read groups and marks  
210 PCR duplicate reads for each individual, merges bam files within each species, calls indels and  
211 single-nucleotide polymorphisms on merged bam files, and phases high-quality indels and SNPs  
212 to produce vcf files of phased SNPs. We further filtered this dataset using vcftools 0.1.16  
213 (Danecek et al., 2011) to remove SNPs with quality scores less than 30 and read depth less than  
214 5.5, those with greater than 75% missing data, restricted to bi-allelic loci, and removed indels.  
215 We refer to this dataset as the “linked SNP dataset”, as it contains multiple SNPs per locus. We  
216 then sampled at random one SNP per UCE locus to obtain a final dataset of putatively unlinked  
217 SNPs, which we refer to as the “unlinked SNP dataset”. To obtain phased alignments we used  
218 Phyluce 1.6.7 (Faircloth, 2015) to phase UCE loci following Andermann et al. (2019), phasing

219 data by mapping reads against the reference individual using the Phyluce tools *snp\_bwa\_align*  
220 and *snp\_phase\_ucsc*. This pipeline maps raw reads against contigs of a reference individual  
221 using BWA 0.7.17 (Li and Durbin, 2009), and then sorts and phases alleles in SAMtools 0.1.19 (Li  
222 and Durbin, 2009) and Picard (Broad Institute, Cambridge, MA). We used MAFFT 7.130b (Katoh  
223 and Standley, 2013) in the Phyluce tool *align\_seqcap\_align* to align and edge-trim the contigs  
224 output by this pipeline, treating the two alleles as separate individuals and allowing ambiguous  
225 sites in alignments. We produced a final alignment using the Phyluce 1.6.7 (Faircloth, 2015) tool  
226 *get\_only\_loci\_with\_min\_taxa* to produce a 75% complete data matrix. This tool calculates the  
227 data matrix completeness as the percentage of individuals in the dataset with sequence data  
228 for each locus.

229         To investigate fine-scale patterns of population structure within each species we called  
230 SNPs within each species or species complex to obtain an additional six SNP datasets. We  
231 grouped samples based on the clades in the Exabayes phylogeny estimated from the 75%  
232 complete UCE data matrix (see section 2.6). Three clades corresponded to species (*ornata*,  
233 *leucophthalma*, and *gutturalis*) and a fourth to a set of closely related taxa that have undergone  
234 considerable taxonomic rearrangement through history (*dentei*, *amazonica*, *spodionota*,  
235 *sororia*, *pyrrhonota*, *haematonota*, and *fjeldsaai*). This latter clade is hereafter referred to as  
236 the “*haematonota s.l.*” clade. Within the *haematonota s.l.* clade we additionally subdivided  
237 taxa into two clades for SNP calling: one containing *dentei*, *amazonica*, *spodionota*, and *sororia*  
238 (hereafter the “*amazonica + spodionota*” clade), and the other containing *pyrrhonota*,  
239 *haematonota*, and *fjeldsaai* (hereafter the “*haematonota + pyrrhonota*” clade). For each

240 dataset we selected as a reference the individual with the highest number of assembled contigs  
241 after filtering (Supplemental Table 4) and repeated the *seqcap\_pop* pipeline described above.

242

## 243 2.6. Phylogenetic estimation

244

245 From the 2,386 locus UCE dataset we estimated a phylogenetic tree with all samples  
246 using a Bayesian analysis in Exabayes 1.5 (Aberer et al., 2014) using the 75% complete  
247 concatenated phased alignment. We conducted 4 independent runs for 2 million generations  
248 each, discarding the first 25% of trees as burn-in. After checking in Tracer 1.7.1 (Rambaut et al.,  
249 2018) that samples had converged based on ESS values greater than 200, we generated an  
250 extended majority-rule consensus tree using the topologies from the four independent runs.  
251 We used this topology to estimate a time-calibrated phylogenetic tree in BEAST 2.5.2  
252 (Bouckaert et al., 2019). For this analysis we took the tree estimated in Exabayes and trimmed it  
253 to include only the samples for which we obtained draft mitochondrial genomes (the Exabayes  
254 UCE phylogeny containing all samples is available in Figure S1), and one allele per individual.  
255 We then made this tree ultrametric using the *chronos* function in ape 5.2 (Paradis and Schliep,  
256 2018) and used the resulting topology as a constraint tree through the entire BEAST analysis.  
257 No fossils are available for *Epinecrophylla* or its close relatives to allow for a fossil calibration of  
258 our phylogenetic tree. We therefore used three combinations of mitochondrial alignments and  
259 substitution rates to estimate the branch lengths for this topology. We first used the  
260 concatenated alignment of the 13 mitochondrial protein-coding genes and the widely used  
261 mitochondrial cytochrome B (CytB) 2.1% substitution rate obtained from Hawaiian

262 honeycreepers (Lerner et al., 2011; substitution rate: 0.01105 substitutions/site/Myr, 95%  
263 Confidence Interval [CI]: 0.00425–0.01785). The second method used the alignment of  
264 cytochrome B (CytB) extracted from the draft mitochondrial genomes and the same CytB  
265 substitution rate. For the final analysis we analyzed the third codon position of CytB and used a  
266 mass-calibrated substitution rate following (Nabholz et al., 2016) using the third codon position  
267 and their calibration set 2 (substitution rate: 0.0208 substitutions/site/Myr, 95% CI: 0.0170–  
268 0.0263). Body mass estimates were obtained from specimens at the Louisiana State University  
269 Museum of Natural Science (mean = 9.30 g, SD = 1.18, n = 229), representing all species in the  
270 genus. We used the date estimate from a dated phylogeny of all suboscine passerines to  
271 constrain the root of our phylogeny (Harvey et al., in press), and set *E. fulviventris* as the  
272 outgroup, with the date of 9.28 Ma (95% CI: 8.60–11.07 Ma) as the prior on the root node. For  
273 each analysis we used the GTR +  $\gamma$  model of rate variation and a proportion of invariant sites, a  
274 log-normal relaxed clock, a yule model on the tree, and default settings for other priors. We ran  
275 each analysis for 100 million generations, sampling every 10,000, and a burn-in of 10%. We  
276 checked in Tracer 1.7.1 (Rambaut et al., 2018) that all parameters reached convergence with  
277 ESS values over 200. Both analyses using the CytB alignment were unable to converge and had  
278 multiple priors with ESS values well below 200, indicating inappropriate priors and/or  
279 insufficient generations. The analysis using the draft mitochondrial genome alignment,  
280 however, converged with ESS values over 200 for all parameters. For the mitogenome analysis  
281 we calculated a maximum clade credibility (MCC) tree in TreeAnnotator 2.5.1 from the  
282 posterior of trees, implemented in BEAST 2.5.2 (Bouckaert et al., 2019), and visualized the  
283 resulting tree in FigTree 1.4.4 (Rambaut, 2009).

284           We used SNAPP 1.4.2 (Bryant et al., 2012) implemented in BEAST 2.5.2 (Bouckaert et al.,  
285 2019) to calculate a species tree directly from SNP data in a full-coalescent analysis. This site-  
286 based method has the advantage of bypassing gene tree estimation and minimizing error due  
287 to the low information content of individual UCE loci. Initial runs using all samples in our  
288 dataset were unable to converge in a reasonable amount of time, either with individuals as  
289 separate tips or with individuals pooled to tips by clade identified from the Exabayes 75% UCE  
290 phylogeny. Therefore, we called SNPs again using two sample-filtering and locus-filtering  
291 strategies, all with *Myrmorchilus strigilatus* as an outgroup; the first using up to two samples  
292 from each clade identified in the Exabayes 75% phylogeny for a total of 19 samples, and the  
293 second using one sample from each widely recognized species in the genus for a total of 11  
294 samples. In both datasets we used the individual from each taxon that had the greatest number  
295 of loci recovered to maximize the number of SNPs recovered and allowed 5% missing data.  
296 Otherwise we followed the *seqcap\_pop* and SNP filtering pipeline described in section 2.5. After  
297 SNP filtering we selected at random one SNP per locus to minimize issues with linkage within a  
298 locus. In all runs we calculated the mutation rates from the data and used default priors. We  
299 ran all analyses for 2 million generations, storing every 1,000 generations, and a burn-in of 10%,  
300 and checked that the run converged in Tracer 1.7.1 (Rambaut et al., 2018) based on ESS values  
301 over 200. From the posterior of species trees we calculated a maximum clade credibility (MCC)  
302 tree in TreeAnnotator 2.5.1 implemented in BEAST 2.5.2 (Bouckaert et al., 2019). We used  
303 Densitree 2.0.1 (Bouckaert, 2010) to visualize the posterior tree set of the SNAPP runs and  
304 FigTree 1.4.4 (Rambaut, 2009) to visualize the MCC tree.

305           In addition to the analyses outlined above, we conducted a variety of phylogenetic  
306 analyses, each with its own assumptions, strengths, and weaknesses relative to treating sources  
307 of phylogenetic variation. Details and results for these analyses are available in the  
308 Supplementary Materials.

309

### 310 *2.7. Population genetics and introgression*

311

312           In addition to our phylogenetic analyses we utilized SNPs to investigate patterns of  
313 population-level genetic structure and also introgression within and between clades. We used  
314 STRUCTURE (Pritchard et al., 2000) and Discriminant Analysis of Principal Components (DAPC)  
315 to analyze patterns of population structure within each clade, and implemented each analysis  
316 on all six clade-level SNP datasets described above. For STRUCTURE we analyzed the linked SNP  
317 datasets and implemented the *linked* model, providing the distance in base pairs between SNPs  
318 within each locus, and ran analyses for 2 million generations, discarding the first 50,000 as  
319 burn-in. We ran 10 replicate analyses for each value of K from one to 10, or until the likelihood  
320 value of K decreased significantly. We selected the best K value based on the  $\Delta K$  method of  
321 Evanno (Evanno et al., 2005), implemented in STRUCTURE HARVESTER (Earl and vonHoldt,  
322 2012).

323           DAPC uses sequential k-means clustering of principal components to infer the number  
324 of genetic clusters in a dataset. We conducted a DAPC analysis in *adegenet* (Jombart and  
325 Ahmed, 2011), following the recommendations of Jombart et al. (2010), and selected the best  
326 number of clusters based on the lowest Bayesian Information Criterion (BIC) score. In addition,

327 we conducted a Principal Components Analysis (PCA) analysis, with samples coded by DAPC  
328 group assignments. Although BIC scores for the *haematonota s.l.* clade indicated that K values  
329 greater than 2 had a worse fit to the data than K=2, we calculated DAPC group assignments for  
330 K values from 3–5 to investigate finer-scale patterns of population structure, due to the greater  
331 number of described taxa in this clade.

332 We calculated pairwise distance estimates between all taxa in the group from both the  
333 mitochondrial and nuclear DNA data. For the mitochondrial distances we used the alignment of  
334 the 13 mitochondrial protein-coding genes. On a neighbor-joining tree reconstructed from the  
335 raw *p*-distance matrix in PAUP\* 4.0 (Swofford, 1999), we estimated the proportion of invariant  
336 sites (0.590355) and the gamma shape parameter (1.82626). These values were then fixed for  
337 calculations of a distance matrix under the GTR +  $\gamma$  + I finite-sites substitution model. For the  
338 nuclear data we estimated the weighted fixation index ( $F_{st}$ ) between each pair of taxa using the  
339 method of Weir and Cockerham (1984) implemented in vcftools 0.1.16 (Danecek et al., 2011)  
340 using the unlinked SNP dataset. For all calculations we also report the average within-taxon  
341 distance estimates as a measure of intra-specific genetic structure.

342

### 343 **3. Results**

344

#### 345 *3.1. Sequencing results and sample identification*

346

347 Illumina sequencing of UCEs resulted in an average of 3.8 million reads per individual,  
348 and an average read length of 130 bp after trimming. After removing potentially contaminated



349 or misidentified samples our dataset contained 63 *Epinecrophylla* samples and two outgroups.  
350 Including the three potentially contaminated *Epinecrophylla* samples (based on BOLD results) in  
351 a phylogenetic tree estimated in RAxML 8.2.12 (Stamatakis, 2014), two grouped with the  
352 correct taxon but sat on abnormally long terminal branches, suggesting contamination, and a  
353 third grouped with the outgroup samples, suggesting sample misidentification (Figure S1H).  
354 After assembly and locus filtering we obtained an average of 2,195 UCE loci per sample (range  
355 1,234–2,306 loci), with a mean locus length of 652 bp (range 234–1,283 bp) and mean read  
356 depth of UCE loci of 22.5x (SD: 43.0x). Missing data had a strong effect on the number of UCE  
357 loci retained in the alignment, and the alignment that including no missing data contained 330  
358 UCE loci and was not analyzed further. The 95% complete phased alignment contained 1,659  
359 UCE loci and an aligned matrix of 1,140,275 bp and the 75% complete phased alignment  
360 contained 2,149 UCE loci and an aligned matrix of 1,401,699 bp.

361 We obtained partial or complete mitochondrial genomes for 59 ingroup samples and  
362 both outgroups, including at least one sample per species (Table S2). Three samples, including  
363 one of the outgroups, contained greater than 40% missing data and were removed from the  
364 analysis (Table S2). The average mitochondrial genome size was 17,253 bp (range 16,017–17,  
365 930 bp) and had a mean read depth of 304.4x (SD: 780.0x). The aligned dataset of 56 individuals  
366 using the 13 mitochondrial protein-coding genes was 11,488 bp in length (range 9,921–11,396  
367 bp), contained a total of 635,429 bp, and 4.8% missing data.

368

### 369 3.2. Phylogenetic estimation

370

371 From the nuclear UCE data, we recovered a phylogeny with strong support for  
372 relationships among taxa (Figure 2, Figure 3, Figure S1). The deepest split in the tree occurred  
373 across the Andes, dividing *E. fulviventris* from the remainder of the genus. Although our  
374 sampling included just two samples of *E. fulviventris*, one of which (sample 1) is from a  
375 population occasionally separated as the subspecies *costaricensis* (del Hoyo et al., 2019; Todd,  
376 1927), our phylogenies indicated a relatively shallow divergence between the two samples  
377 (Figure S1). The next split separated *E. ornata* from the remaining taxa (Figure 1A, Figure 2).  
378 Although we lacked samples for two taxa within this species (*E. o. ornata* and *E. o. saturata*),  
379 the two parapatric gray-backed taxa occurring in Peru (*E. o. meridionalis* and *E. o. atrogularis*)  
380 are recovered as non-sister lineages, with the southern *meridionalis* sister to the rufous-backed  
381 *hoffmannsi* of eastern Brazil, and *atrogularis* sister to those two. The next split contained the  
382 sister species *E. erythrura* and *E. leucophthalma*, which together are sister to the remaining  
383 taxa (Figure 1B, Figure 2). These two species are reciprocally monophyletic, but within *E.*  
384 *leucophthalma* we recovered the nominate subspecies as paraphyletic. Within this nominate  
385 subspecies of *E. leucophthalma*, the western populations (samples 13–16) showed a deep  
386 divergence from the remainder of the species. The final clade contained eight parapatric taxa  
387 (*gutturalis*, *dentei*, *amazonica*, *spodionota*, *sororia*, *pyrrhonota*, *haematonota*, and *fjeldsaai*)  
388 that together range across the majority of the Amazon Basin (Figure 1C, Figure 2). The Guiana  
389 Shield taxon *E. gutturalis* was sister to the rest of the taxa in this clade, but contains minimal  
390 genetic structure in the phylogeny (Figure 2). The remaining taxa can be divided into three  
391 groups with similar divergence times between them (Figure 2). The first group contained the  
392 southeastern Amazonian *E. amazonica* (including the subspecies *dentei*) and the Andean

393 foothill *E. spodionota* (including the subspecies *sororia*), the second is the northwestern  
394 Amazonian taxon *E. haematonota pyrrhonota*, and the third is the western Amazonian *E.*  
395 *haematonota haematonota* (including the subspecies *fjeldsaai*). The taxon *fjeldsaai* was  
396 embedded within *haematonota* in all analyses. Our dated phylogeny placed *pyrrhonota* sister to  
397 *haematonota*, with *amazonica* and *spodionota* sister to those. Analyses of nuclear data with a  
398 variety of phylogenetic methods (see Supplementary Material) largely supported the above  
399 results. However, some phylogenetic analyses of nuclear and mitochondrial data indicated  
400 support for two alternate topologies with regard to the placement of *E. h. pyrrhonota* (Figure  
401 4), with varying degrees of node support (Figure S1, S2). Branch lengths in the dated phylogeny  
402 produced some results slightly discordant with those from other phylogenetic analyses,  
403 suggesting that the oldest splits within *E. ornata* and *E. leucophthalma* are as old or older than  
404 some of the species-level splits within the *haematonota s.l.* clade (Figure 2).

405         The site-based MCC phylogeny estimated in SNAPP using one sample per species  
406 produced the same inter-specific topology as that recovered in the dated phylogeny, but with  
407 low support for two nodes (Figure 3B). The Densitree representation of the posterior of species  
408 trees showed that these nodes contained a primary topology the same as that recovered in the  
409 other nuclear analyses, but with minor alternate topologies at nodes with lower support in the  
410 MCC tree (Figure 3A). These are the same nodes that showed low support in the mitochondrial  
411 phylogeny or in which the mitochondrial phylogeny differed from the nuclear phylogeny (Figure  
412 S1, S2). The expanded SNAPP analysis using 19 samples recovered the same topology in the  
413 MCC tree, but with much lower support for multiple nodes (Figure S4B). This was reflected in  
414 considerable uncertainty in the Densitree representation of the posterior of species trees,

415 which showed many alternate topologies both near the root of the tree and with regards to the  
416 placement of *pyrrhonota* (Figure S4A).

417

### 418 3.3. Population genetics

419

420 DAPC analyses with k-means cross-validation estimated a best fit model of K=2 for each  
421 of three clades: *E. leucophthalma*, *E. ornata*, and *haematonota s.l.*, and a model of K=1 for *E.*  
422 *gutturalis* (Figure 5). For *E. leucophthalma* this divided the species into the “*leucophthalma*  
423 west” clade (samples 13–16) and the remainder of the eastern taxa, including the  
424 “*leucophthalma* east” clade. For *E. ornata*, DAPC separated the central Peruvian *atrogularis*  
425 from the two eastern taxa. Lastly, for the *haematonota s.l.* group, the best fit model of K=2  
426 separated *pyrrhonota* from the remainder of the group. The worse-fit models of K>2 (based on  
427 BIC scores) for the *haematonota s.l.* clade first separated the *E. spodionota* + *E. amazonica*  
428 clade at K=3, then *E. spodionota* from *E. amazonica* at K=4, and the western-most sample (#54)  
429 of *E. h. pyrrhonota* at K=5. PCA plots with points labeled by taxon and sample number are  
430 shown in Figure S5.

431 STRUCTURE results (Figure 5) largely recapitulated those from DAPC but provided a  
432 more in-depth view of individuals with potential genetic backgrounds from multiple  
433 populations (i.e. potential introgression). Results from the Evanno method based on the  $\Delta K$   
434 value were unambiguous in all cases. However, in all cases the STRUCTURE plot for the “best”  
435 value of K from the Evanno method added a population that was evenly assigned across all  
436 individuals. Therefore, we consider the STRUCTURE plot for the “best” K minus 1 to be a more

437 biologically realistic representation of the data and report all STRUCTURE plots >1 that have  
438 high likelihood values, following the recommendation of Meirmans (2015). Because the Evanno  
439 method is unable to calculate a  $\Delta K$  value at  $K=1$  and because all individuals of *E. gutturalis* were  
440 approximately equally assigned to both populations at  $K=2$ , we consider a  $K=1$  to be the best-fit  
441 model for that species. For *E. leucophthalma*,  $K=2$  separated the “*leucophthalma west*” clade  
442 from the remainder of the eastern taxa, but with all individuals containing a small percentage of  
443 genetic membership from the other clade. Within *E. ornata*, results were similar to those of  
444 DAPC, with *atrogularis* the most distinct at  $K=2$ , but with all individuals having a proportion of  
445 their ancestry assigned to both populations. The pattern in the STRUCTURE plots for the  
446 *haematonota s.l.* clade was more complex. At  $K=2$ , STRUCTURE assignments largely separated  
447 *E. h. pyrrhonota* from *E. spodionota* + *E. amazonica*, with all individuals of the *E. h.*  
448 *haematonota* + *E. h. fjeldsaii* group having about equal ancestry between the two groups. This  
449 pattern was also reflected also in the intermediate position of the *E. h. haematonota* + *E. h.*  
450 *fjeldsaii* group along the first principal component of the PCA results. At  $K=3$  STRUCTURE  
451 separated three groups that corresponded to taxonomy, with most individuals showing only a  
452 small proportion of shared population assignments: 1) *E. h. pyrrhonota*, 2) *E. spodionota* + *E.*  
453 *amazonica*, and 3) *E. h. haematonota* + *E. h. fjeldsaii*. The “best” value of  $K=4$  provided only a  
454 slight suggestion of differentiation between *E. spodionota* and *E. amazonica*, with *E. a. dentei*  
455 genetically indistinguishable from *E. a. amazonica* and *E. s. sororia* genetically indistinguishable  
456 from *E. s. spodionota*.

457

458 4. DISCUSSION

459

460 *4.1. Phylogeny and population genetics*

461 Our analyses of nuclear and mitochondrial data largely resolved the evolutionary  
462 relationships among *Epinecrophylla* taxa and recovered three broadly sympatric species  
463 complexes in the Amazon Basin. We consider the topology of the phylogeny illustrated in Figure  
464 2 to be the best representation of relationships in the group based on the consistently high  
465 support values across multiple methods that recovered this topology (Figure 3, Figure 4, Figure  
466 S1A-D, Figure S1G). Although there was some disagreement among methods and data types  
467 regarding the placement of the taxon *pyrrhonota* (Figure 4), most of the topologies that  
468 disagreed with the sister relationship of *pyrrhonota* and *haematonota* received low support for  
469 that node, often in conjunction with a very short subtending branch (Figure S1E-F). These short  
470 branches suggest that the divergence between the three clades in the *haematonota s.l.* clade  
471 was likely very rapid, which may explain the conflicting signal across methods and the support  
472 for alternate topologies in the SNAPP posterior distributions (Figure 3A, Figure S4A). Because a  
473 strictly bifurcating tree is likely not an appropriate model for intraspecific relationships in cases  
474 of high levels of gene flow (Eckert and Carstens, 2008), our population genetics results may be a  
475 better representation of the evolutionary relationships among individuals at this fine scale. The  
476 evolutionary patterns recovered with these population genetics analyses indicate little  
477 differentiation between most subspecies and even between some taxa currently recognized as  
478 species (e.g. *E. spodionota* and *E. amazonica*). The three Amazonian species complexes that we  
479 recovered in our phylogeny are sympatric across much of the western Amazon Basin, but are  
480 represented by one species each in the eastern parts of the Basin. These species complexes are

481 1) *E. ornata*, 2) *E. leucophthalma* and *E. erythrura*, and 3) *E. gutturalis* and the “*haematonota*  
482 *s.l.*” group. Each complex contains taxa that are either allopatric or largely parapatric, with  
483 distributions typically bounded by large rivers (Figure 1). We discuss the phylogenetic results  
484 and taxonomic implications of each species separately.

485

#### 486 4.2. *Epinecrophylla fulviventris*

487

488 *Epinecrophylla fulviventris* was recovered as sister to the remainder of the genus in all  
489 analyses and with relatively shallow divergence between our two samples in most phylogenies.  
490 We lack the geographic sampling or morphological data to make any taxonomic  
491 recommendations for this species, and thus suggest maintaining the current treatment of a  
492 monotypic *E. fulviventris* (e.g. Clements et al., 2019; Zimmer and Isler, 2003).

493

#### 494 4.3. *Epinecrophylla ornata*

495

496 The only predominantly gray-bodied species in the genus, our results for this  
497 morphologically distinctive group are hampered by the lack of samples of the nominate taxon  
498 and the geographically adjacent taxon *saturata*. The species was described from a “Bogota”  
499 skin and is thus of uncertain provenance, although typically assumed to be from the lowlands of  
500 southern Amazonian Colombia (Peters, 1951). However, without samples from Ecuador or  
501 southern Colombia, we are unable to fully resolve the relationships within this species or  
502 recommend taxonomic changes. Despite the lack of these samples, we discovered deep splits

503 and high population structure among all three subspecies in our phylogenetic analyses,  
504 suggesting that multiple species-level taxa occur in the group. The most genetically distinct of  
505 the three taxa in phylogenetic and population genetic analyses was *E. o. atrogularis* of central  
506 Peru, which all analyses placed as sister to *E. o. meridionalis* + *E. o. hoffmannsi*, thus  
507 contradicting the opinion of some authors (e.g. del Hoyo et al., 2019) that *hoffmannsi*  
508 represents a species distinct from the other four taxa in *E. o. ornata*. This relationship is  
509 surprising given the phenotypic similarity of *atrogularis* and *meridionalis*, which both lack the  
510 rufous back of the other three taxa in the *ornata* group and differ from each other primarily in  
511 the slightly duller underparts of female *atrogularis*. *E. o. atrogularis* and *E. o. meridionalis*  
512 potentially come into contact in the Ucayali Region of southern Peru, and further research on  
513 this contact zone is of interest given the deep genetic split between the two taxa presented  
514 here. Reports of specimens of *meridionalis* with some rufous on the back from southern Peru in  
515 Cusco and Madre de Dios have been suggested to be either variation within that taxon or  
516 evidence of introgression with one of the rufous-backed forms (Ridgely and Tudor, 1994). Based  
517 on the population genetic results (Figure 5D) presented here we suspect that the latter is a  
518 more likely explanation given that our STRUCTURE results show individuals with shared  
519 population assignments between all three subspecies that we sampled, despite the deep  
520 genetic splits among them.

521

522 *4.4. Epinecrophylla leucophthalma* and *E. erythrura*

523



524 Ours is the first study to suggest a sister relationship between these two species. The split  
525 between the two species is quite deep, and the two species have largely parapatric  
526 distributions (Figure 1B), but are locally sympatric in Peru (Schulenberg et al., 2007; Álvarez  
527 Alonso, 2002) without showing any morphological signs of introgression, thus confirming their  
528 status as species. Notably, we found that the nominate subspecies of *E. leucophthalma* is  
529 paraphyletic as currently recognized, with western populations of *E. leucophthalma* sister to a  
530 group containing the subspecies *sordida* and *phaeonota* and the eastern populations of the  
531 nominate subspecies. This deep genetic divergence within *E. leucophthalma* is comparable to  
532 some divergences among taxa considered to be species within the *haematonota s.l.* clade, in  
533 particular between *E. spodionota* and *E. amazonica*, but to our knowledge no morphological  
534 characters have been proposed to diagnose this western population. Excluding that western  
535 population, the remainder of the *E. leucophthalma* samples in our analysis showed extremely  
536 low divergence among them, although most of our nuclear phylogenies grouped samples into  
537 the subspecies *sordida*, *phaeonota*, and the eastern clade of *leucophthalma*. Because the  
538 geographically intermediate taxon *phaeonota* is morphologically distinctive (rufous back in  
539 *phaeonota* vs brown in all other *leucophthalma* taxa), we support the continued treatment of  
540 the three *leucophthalma* taxa as separate subspecies despite the lack of genetic divergence  
541 between them. The type locality of *E. leucophthalma* is on the right bank of the Madeira River  
542 at Salto do Jirau, Rondônia, Brazil (Pelzeln and Natterer, 1871), in the same interfluvium and just  
543 150 km to the north of our sample #20 (Figure 1B), thus suggesting that the name  
544 *leucophthalma* applies to the eastern clade of *E. l. leucophthalma* and that the Madeira River  
545 may correspond to the deep genetic break within the species. The southern Andean foothill

546 taxon *dissita* comes into contact with our western clade of *E. I. leucophthalma* in southern Peru  
547 (Figure 1B), so the name *dissita* could potentially be expanded to include the rest of Peru and  
548 Pando, Bolivia (i.e. our “*leucophthalma west*” clade). Alternatively, a new name might be  
549 necessary for the western population of *E. I. leucophthalma*. However, genetic samples of  
550 *dissita* are needed to confirm which of these alternative treatments is appropriate. Estimates of  
551 the finite-sites mitochondrial distance and weighted nuclear  $F_{st}$  between the western clade of *E.*  
552 *I. leucophthalma* and all eastern populations are 6.3% and 0.29, respectively (Table S3, S4).

553

#### 554 4.5. *Epinecrophylla haematonota* group

555

556 This clade contains eight taxa that have undergone many taxonomic rearrangements  
557 throughout their history (Cory and Hellmayr, 1924; del Hoyo et al., 2019; Dickinson and  
558 Christidis, 2014; Isler and Whitney, 2018; Peters, 1951; Remsen et al., 2019; Whitney et al.,  
559 2013; Zimmer, 1932a; Zimmer and Isler, 2003). Our phylogenetic analyses indicate that *E.*  
560 *gutturalis* is part of this species complex and is sister to the rest of the clade. All of our  
561 phylogenetic and STRUCTURE analyses showed no population structure within *E. gutturalis*  
562 across its range. DAPC results showed low levels of structure, but still indicated a  $K=1$  based on  
563 BIC scores. The five samples that showed slight divergence from the main cluster in the PCA  
564 results (Figure 5C; sample numbers 32, 34, 35, 36, and 40) did not cluster based on geography.  
565 While there was some disagreement among analyses on the relationships between the rest of  
566 the taxa in this group, particularly with regard to the placement of *pyrrhonota*, most of our  
567 analyses agree with the topology in Figure 2. Following that topology, the next split in this clade

568 presents an interesting biogeographic pattern, separating the western lowland Amazonian taxa  
569 *pyrrhonota*, *haematonota*, and *ffeldsaai*, from a clade containing the Andean foothill taxa  
570 *spodionota* and *sororia* and the southeastern Amazonian lowland *amazonica* and *dentei*. The  
571 only known sympatry between any taxa in this group occurs on the east slope of the Andes in  
572 southern Colombia where Salaman et al. (2002) reported *pyrrhonota* and *spodionota* being  
573 captured in the same mist-nets, thus necessitating at a minimum the separation of *pyrrhonota*  
574 and *E. amazonica* + *E. spodionota* as biological species. Given the similar divergence times  
575 between *pyrrhonota*, *E. amazonica* + *E. spodionota*, and *E. haematonota* + *E. ffeldsaai* we  
576 suspect that these three lineages likely represent separate biological species.

577 Isler et al. (1998) developed a yardstick-based system to evaluate species limits in  
578 Thamnophilidae based on vocalizations and applied this to *haematonota*, *pyrrhonota*, and  
579 *ffeldsaai*, finding that the three taxa did not differ in vocalizations and were best regarded as  
580 three subspecies of *E. haematonota* (Isler and Whitney, 2018). Our results suggest that the  
581 divergence between *pyrrhonota* and *E. amazonica* + *E. spodionota* (mtDNA 6.1%, weighted  $F_{st}$   
582 0.34) is comparable to that between *pyrrhonota* and *E. h. haematonota* + *E. h. ffeldsaai* (mtDNA  
583 5.7%, weighted  $F_{st}$  0.25), and some analyses indicating a closer relationship between the  
584 former groups than the latter (Figure 4), albeit with weak support. This, combined with the  
585 results from our DAPC and STRUCTURE analyses which indicate that *pyrrhonota* is the most  
586 divergent taxon in this group, and in particular more so than *E. amazonica* is from *E.*  
587 *spodionota*, that *E. pyrrhonota* is best regarded as a distinct species. A more thorough  
588 evaluation of the utility of this yardstick system between all *Epinecrophylla* taxa is desirable,

589 although the results presented here indicate that it may not be a reliable indicator of species  
590 status in all cases.

591 Our results support the continued treatment of *fjeldsaai* as a subspecies of *E.*  
592 *haematonota* due its morphological distinctiveness, but were more ambiguous with regard to  
593 the taxonomic status of *dentei*. None of our analyses were able to differentiate *fjeldsaai* from  
594 *haematonota*, and all phylogenetic analyses indicated that *fjeldsaai* was embedded within  
595 *haematonota*. This treatment is further supported by evidence of hybridization between the  
596 two taxa in northwestern Peru (LSUMNS specimens). In fact, one of our samples of *fjeldsaai*  
597 (sample 62) has some rufous coloration on the lower back suggestive of hybridization. *E. a.*  
598 *dentei* was placed as sister to *E. a. amazonica* in all phylogenetic analyses, but with relatively  
599 shallow divergence (mtDNA 2.8%, weighted  $F_{st}$  0.19). Our population genetic analyses including  
600 all samples in the *haematonota s.l.* clade were unable to distinguish *amazonica* and *dentei*  
601 (Figure 5), and in fact were largely unable to differentiate *E. amazonica* and *E. spodionota*. A  
602 DAPC analysis using just the three samples of *amazonica* and the one of *dentei* did suggest a  
603  $K=2$  was the best model based on BIC scores and separated the *dentei* sample from the rest of  
604 *amazonica* (Figure S6).

605 In summary, we recommend the following 4-species treatment for the taxa in the  
606 *haematonota* group: *E. haematonota* (with *fjeldsaai* as a subspecies), *E. pyrrhonota*, *E.*  
607 *amazonica* (with *dentei* as a subspecies), and *E. spodionota* (with *sororia* as a subspecies). Until  
608 genetic samples of *E. leucophthalma dissita*, *E. o. ornata*, and *E. o. saturata* are available for  
609 study, we refrain from making taxonomic recommendations in those groups, but we suspect  
610 that both *E. leucophthalma* and *E. ornata* contain multiple species-level taxa. Therefore, we

611 recommend the following species-level linear taxonomy for *Epinecrophylla*: *fulviventris*, *ornata*,  
612 *erythrura*, *leucophthalma*, *gutturalis*, *haematonota*, *pyrrhonota*, *amazonica*, *spodionota*.

613

#### 614 4.6. Biogeographic patterns

615

616 Having three broadly sympatric species or species complexes distributed across the  
617 Amazon Basin provides replicated evolutionary histories across a shared landscape. Of interest  
618 is the response of each of these species or species complexes to well-known biogeographic  
619 barriers in the Amazon Basin, such as large rivers (Capparella, 1991; Wallace, 1854). The major  
620 river systems of the Amazon Basin, such as the Solimões, Negro, and Madeira all appear to have  
621 an effect on the genetic structure and range limits of *Epinecrophylla* taxa, delimiting many  
622 species and subspecies that show significant genetic breaks at those locations in our analyses.  
623 Smaller river systems, however, appear to have idiosyncratic effects on genetic structure, with  
624 some delimiting genetic groups in one species, but having little to no effect in others. For  
625 example, the Purús River is a major barrier for *E. ornata*, but has little effect on the genetic  
626 structure of other groups, while the Tapajos River is a barrier for *E. leucophthalma* but not *E.*  
627 *ornata*. Additionally, the distribution and genetic boundaries of phenotypically distinctive taxa  
628 such as *fjeldsaai* and *phaeonota* do not appear to always follow biogeographic barriers that  
629 affect other bird species. The brown-backed *fjeldsaai*, which we find to be phylogenetically  
630 embedded within the rufous-backed *haematonota*, hybridizes with *haematonota* within the  
631 Napo interfluve without any clear biogeographic barrier separating the two taxa. Likewise, the  
632 rufous-backed *phaeonota* is part of the otherwise brown-backed *leucophthalma* group, and

633 appears to replace the eastern populations of nominate *leucophthalma* somewhere between  
634 the Juruena and Roosevelt Rivers.

635 Although all three *Epinecrophylla* species complexes overlap in much of the western  
636 Amazon Basin, there is evidence that competition may play a role in their ability to coexist over  
637 broad spatial scales. For example, J. Tobias (personal communication) found *E. leucophthalma*  
638 and *E. amazonica* regularly at the same site in Madre de Dios, Peru, but the two species rarely  
639 occurred in the same mixed species flock. Likewise, in Napo, Ecuador, Whitney (1994) found *E.*  
640 *ornata* and *E. erythrura* in the same mixed species flock on just one occasion, although three  
641 species of *Epinecrophylla* occurred at the site.

642 That two species complexes – *E. ornata* and *E. leucophthalma* + *E. erythrura* – are absent  
643 from the Guiana Shield and the northern half of the Inambari interfluve (Figure 1A, 1B) is  
644 perplexing. This pattern may be due to the vagaries of extinction, interspecific competition, or  
645 habitat suitability, or some combination of those factors, all of which require further study. For  
646 example, suboptimal habitat may increase competition between such closely related and  
647 ecologically similar species, leading to local extinctions. Alternatively, more drastic climate  
648 fluctuations in the eastern half of the basin may be driving this pattern. There is evidence that  
649 the eastern Amazon Basin became much drier during the glacial periods of the Pleistocene,  
650 whereas climate of the western Amazon Basin has maintained more stable over the same time  
651 period, which is thought to have resulted in relatively higher losses of biodiversity in the  
652 eastern half of the basin (Cheng et al., 2013). A north-south gradient in vegetation composition  
653 exists in the Inambari interfluve (Tuomisto et al., 2019) and the Guiana Shield is relatively drier  
654 than much of the western Amazon (Fick and Hijmans, 2017), so these species may be unable to

655 persist in these areas. Likewise, the *haematonota* group is absent from the Brazilian Shield,  
656 while the other two species complexes are present there.

657

#### 658 *4.7. Areas of potential future research*

659

660 The results of our phylogenetic and population genetic analyses suggest that multiple  
661 geographic regions could produce valuable insights with both greater sampling effort and  
662 natural history observations (e.g. playback experiments, surveys of contact zones, analysis of  
663 vocal and morphological traits). The first is in southern Peru in the foothills of southeastern  
664 Madre de Dios region, where three taxa potentially come into close geographic proximity,  
665 namely *spodionota* and *amazonica*, which we recover as sister taxa in our phylogenies, and  
666 *haematonota*. A second region of interest is slightly to the north in southern Ucayali region,  
667 where two subspecies of *ornata*; *atrogularis* and *meridionalis*, replace each other, perhaps  
668 across the Purús River. These two taxa are recovered as non-sister taxa in our phylogenies and  
669 could perhaps come into contact across the headwaters of that river. Genetic samples of the  
670 two northern taxa in the *ornata* group, including the type taxon, are critical to resolving  
671 relationships within that clade. A third region is the headwaters of the Rio Napo in northern  
672 Ecuador, where two taxa currently regarded as subspecies of *haematonota*; *pyrrhonota* and  
673 *ffeldsaai*, could potentially come into contact. Analysis of a contact zone in this region would be  
674 critical to resolving species limits in the *haematonota* group.

675 Despite being the most well-sampled phylogenetic study of *Epinecrophylla* to date, our  
676 study lacked genetic samples from some key areas that could affect the results presented here.

677 The lack of samples for two subspecies of *E. ornata*, including the nominate, hinders our ability  
678 to make any taxonomic recommendations for that species. We also lack samples of *E.*  
679 *leucophthalma dissita* of the Yungas. This taxon comes into contact with the western clade of  
680 nominate *leucophthalma*, and it is possible that the name *dissita* could apply to the entirety of  
681 this clade of western *leucophthalma*, a population that based on our results may represent a  
682 species distinct from the eastern three taxa in the *leucophthalma* group. It is worth noting that  
683 additional taxa have been named within *E. leucophthalma*, but the validity of those taxa has  
684 been questioned as they are generally considered not morphologically diagnosable (del Hoyo et  
685 al., 2019). Two other sampling gaps bear mention; the first is the population of *E. h.*  
686 *haematonota* from the north bank of the Amazon west of the Napo, which is the population  
687 that presumably intergrades with *E. h. fjeldsaii*, and the second is a lack of samples for any  
688 taxon from the vast region of the Brazilian Amazon west of the Madeira River and south of the  
689 Amazon River, which could contain genetically distinct populations and contains the type  
690 locality of *E. amazonica* (Peters, 1951).

691

## 692 **5. Conclusions**

693

694 As has been shown in other Neotropical avian systems (Brumfield, 2005; Musher and  
695 Cracraft, 2018), our study highlights the importance of sampling populations below the species  
696 level, especially in tropical regions, where the taxonomy of many groups is unresolved and  
697 there may be considerable undiscovered morphological and genetic diversity. Our  
698 understanding of phylogenetic relationships has grown dramatically in recent decades as



699 technological advances have allowed us to obtain and analyze sequence data for ever more  
700 genetic markers and individuals, including at the population level in non-model organisms  
701 (Harris et al., 2018; Tan et al., 2019; Zarza et al., 2016; Zucker et al., 2016).

702

### 703 **Acknowledgements**

704

705 OJ was supported by the National Science Foundation Graduate Research Fellowship under  
706 grant no. DGE-1247192. JTH was supported by the National Science Foundation Research  
707 Experiences for Undergraduates under grant no. DEB-1146265. We thank the curators and staff  
708 at the following institutions for providing tissue samples: Gary Graves and Christopher Milensky  
709 at the Smithsonian National Museum of Natural History, Richard Prum and Kristof Zyskowski at  
710 the Yale Peabody Museum, Christopher Witt at the Museum of Southwestern Biology, Joel  
711 Cracraft and Paul Sweet at the American Museum of Natural History, John Bates and Ben Marks  
712 at the Field Museum of Natural History, and Rob Moyle and Mark Robbins at the University of  
713 Kansas Biodiversity Institute & Natural History Museum. Donna Dittmann assisted with tissue  
714 sample processing at the Louisiana State University Museum of Natural Science. Van Remsen,  
715 Daniel F. Lane, Nelson Buainain Neto, and members of the Brumfield Lab provided invaluable  
716 feedback on versions of this manuscript. Marco A. Rego provided assistance with the creation  
717 of Figure 1.

718

### 719 **References**

720

- 721 Aberer, A.J., Kobert, K., Stamatakis, A., 2014. ExaBayes: massively parallel Bayesian tree  
722 inference for the whole-genome era. *Mol Biol Evol* 31, 2553-2556.  
723 10.1093/molbev/msu236.
- 724 Álvarez Alonso, J., 2002. Characteristic avifauna of white-sand forests in northern Peruvian  
725 Amazonia. Baton Rouge, Louisiana, Louisiana State University.
- 726 Andermann, T., Fernandes, A.M., Olsson, U., Topel, M., Pfeil, B., Oxelman, B., Aleixo, A.,  
727 Faircloth, B.C., Antonelli, A., 2019. Allele phasing greatly improves the  
728 phylogenetic utility of ultraconserved elements. *Syst Biol* 68, 32-46.  
729 10.1093/sysbio/syy039.
- 730 Bernt, M., Donath, A., Jühling, F., Externbrink, F., Florentz, C., Fritzscht, G., Pütz, J., Middendorf,  
731 M., Stadler, P.F., 2013. MITOS: Improved de novo metazoan mitochondrial  
732 genome annotation. *Mol Phylogenet Evol* 69, 313-319.  
733 10.1016/j.ympev.2012.08.023.
- 734 Bolger, A.M., Lohse, M., Usadel, B., 2014. Trimmomatic: a flexible trimmer for Illumina  
735 sequence data. *Bioinformatics* 30, 2114-2120. 10.1093/bioinformatics/btu170.
- 736 Bouckaert, R., 2010. DensiTree: making sense of sets of phylogenetic trees. *Bioinformatics* 26,  
737 1372-1373. 10.1093/bioinformatics/btq110.
- 738 Bouckaert, R., Vaughan, T.G., Barido-Sottani, J., Duchene, S., Fourment, M., Gavryushkina, A.,  
739 Heled, J., Jones, G., Kuhnert, D., De Maio, N., Matschiner, M., Mendes, F.K.,  
740 Muller, N.F., Ogilvie, H.A., du Plessis, L., Popinga, A., Rambaut, A., Rasmussen, D.,  
741 Siveroni, I., Suchard, M.A., Wu, C.H., Xie, D., Zhang, C., Stadler, T., Drummond,  
742 A.J., 2019. BEAST 2.5: An advanced software platform for Bayesian evolutionary  
743 analysis. *PLoS Comput Biol* 15, e1006650. 10.1371/journal.pcbi.1006650.
- 744 Bravo, G.A., Renssen, J.V., Jr., Brumfield, R.T., 2014. Adaptive processes drive ecomorphological  
745 convergent evolution in antwrens (Thamnophilidae). *Evolution* 68, 2757-2774.  
746 10.1111/evo.12506.
- 747 Brumfield, R.T., 2005. Mitochondrial variation in Bolivian populations of the Variable Antshrike  
748 (*Thamnophilus caerulescens*). *The Auk* 122, 414-432.
- 749 Brumfield, R.T., Tello, J.G., Cheviron, Z.A., Carling, M.D., Crochet, N., Rosenberg, K.V., 2007.  
750 Phylogenetic conservatism and antiquity of a tropical specialization: army-ant-  
751 following in the typical antbirds (Thamnophilidae). *Mol Phylogenet Evol* 45, 1-13.  
752 10.1016/j.ympev.2007.07.019.
- 753 Bryant, D., Bouckaert, R., Felsenstein, J., Rosenberg, N.A., RoyChoudhury, A., 2012. Inferring  
754 species trees directly from biallelic genetic markers: bypassing gene trees in a full  
755 coalescent analysis. *Mol Biol Evol* 29, 1917-1932. 10.1093/molbev/mss086.
- 756 Capparella, A.P., 1991. Neotropical avian diversity and riverine barriers. *Acta Congressus*  
757 *Internationalis Ornithologici* 20, 307-316.
- 758 Cheng, H., Sinha, A., Cruz, F.W., Wang, X., Edwards, R.L., d'Horta, F.M., Ribas, C.C., Vuille, M.,  
759 Stott, L.D., Auler, A.S., 2013. Climate change patterns in Amazonia and  
760 biodiversity. *Nat Commun* 4, 1411. 10.1038/ncomms2415.
- 761 Chevreux, B., Wetter, T., Suhai, S., 1999. Genome sequence assembly using trace signals and  
762 additional sequence information computer science and biology. *Proceedings of*  
763 *the German Conference on Bioinformatics* 99, 45-56.

- 764 Clements, J.F., Schulenberg, T.S., Iliff, M.J., Billerman, S.M., Fredericks, T.A., Sullivan, B.L.,  
765 Wood, C.L., 2019. The eBird/Clements Checklist of Birds of the World: v2019.  
766 Downloaded from <https://www.birds.cornell.edu/clementschecklist/download/>
- 767 Cory, C.B., Hellmayr, C.E., 1924. Catalogue of birds of the Americas and the adjacent islands.  
768 Part III. Pterotochidae, Conopophagidae, Formicariidae. Field Museum of  
769 Natural History Zoological Series Vol. XIII.
- 770 Danecek, P., Auton, A., Abecasis, G., Albers, C.A., Banks, E., DePristo, M.A., Handsaker, R.E.,  
771 Lunter, G., Marth, G.T., Sherry, S.T., McVean, G., Durbin, R., Group, G.P.A., 2011.  
772 The variant call format and VCFtools. *Bioinformatics* 27, 2156-2158.  
773 10.1093/bioinformatics/btr330.
- 774 de Queiroz, K., 2007. Species concepts and species delimitation. *Syst Biol* 56, 879-886.  
775 10.1080/10635150701701083.
- 776 del Hoyo, J., Elliott, A., Sargatal, J., Christie, D.A., Kirwan, G.e., 2019. Handbook of the Birds of  
777 the World Alive. Lynx Edicions, Barcelona. (retrieved from <http://www.hbw.com/>  
778 on 13/11/2019).
- 779 Dickinson, E.C., Christidis, L.E., 2014. The Howard & Moore complete checklist of the birds of  
780 the world. 4th Edition. Aves Press, Eastbourne, U.K.
- 781 Earl, D.A., vonHoldt, B.M., 2012. STRUCTURE HARVESTER: a website and program for visualizing  
782 STRUCTURE output and implementing the Evanno method. *Conservation*  
783 *Genetics Resources* 4, 359-361.
- 784 Eckert, A.J., Carstens, B.C., 2008. Does gene flow destroy phylogenetic signal? The performance  
785 of three methods for estimating species phylogenies in the presence of gene  
786 flow. *Mol Phylogenet Evol* 49, 832-842. 10.1016/j.ympev.2008.09.008.
- 787 Evanno, G., Regnaut, S., Goudet, J., 2005. Detecting the number of clusters of individuals using  
788 the software STRUCTURE: a simulation study. *Mol Ecol* 14, 2611-2620.  
789 10.1111/j.1365-294X.2005.02553.x.
- 790 Faircloth, B.C., 2013. illumiprocessor: a trimmomatic wrapper for parallel adapter and quality  
791 trimming. 10.6079/J9ILL.
- 792 Faircloth, B.C., 2015. PHYLUCE is a software package for the analysis of conserved genomic loci.  
793 *Bioinformatics* 32, 786-788. 10.1093/bioinformatics/btv646.
- 794 Faircloth, B.C., McCormack, J.E., Crawford, N.G., Harvey, M.G., Brumfield, R.T., Glenn, T.C.,  
795 2012. Ultraconserved elements anchor thousands of genetic markers spanning  
796 multiple evolutionary timescales. *Syst Biol* 61, 717-726. 10.1093/sysbio/sys004.
- 797 Fick, S.E., Hijmans, R.J., 2017. Worldclim 2: New 1-km spatial resolution climate surfaces for  
798 global land areas. *International Journal of Climatology*.
- 799 Hackett, S.J., Rosenberg, K.V., 1990. Comparison of phenotypic and genetic differentiation in  
800 South American Antwrens (Formicariidae). *The Auk* 107, 473-489.
- 801 Hahn, C., Bachmann, L., Chevreur, B., 2013. Reconstructing mitochondrial genomes directly  
802 from genomic next-generation sequencing reads—a baiting and iterative  
803 mapping approach. *Nucleic Acids Research* 41, e129-e129. 10.1093/nar/gkt371.
- 804 Harris, R.B., Alström, P., Ödeen, A., Leache, A.D., 2018. Discordance between genomic  
805 divergence and phenotypic variation in a rapidly evolving avian genus  
806 (*Motacilla*). *Mol Phylogenet Evol* 120, 183–195.

- 807 Harvey, M.G., Bravo, G.A., Claramunt, S., Cuervo, A.M., Derryberry, G.E., Battilana, J., Seeholzer,  
808 G.F., Shearer, M.J., Faircloth, B.C., Edwards, S.V., Pérez-Emán, J.L., Moyle, R.G.,  
809 Sheldon, F.H., Aleixo, A., Smith, B.T., Chesser, R.T., Silveira, L.F., Cracraft, J.,  
810 Brumfield, R.T., Derryberry, E.P., in press. The evolution of a tropical biodiversity  
811 hotspot.
- 812 Harvey, M.G., Smith, B.T., Glenn, T.C., Faircloth, B.C., Brumfield, R.T., 2016. Sequence capture  
813 versus restriction site associated DNA sequencing for shallow systematics. *Syst*  
814 *Biol* 65, 910-924. 10.1093/sysbio/syw036.
- 815 Irestedt, M., Fjeldsa, J., Nylander, J.A., Ericson, P.G., 2004. Phylogenetic relationships of typical  
816 antbirds (Thamnophilidae) and test of incongruence based on Bayes factors.  
817 *BMC Evol Biol* 4, 23. 10.1186/1471-2148-4-23.
- 818 Isler, M.L., Isler, P.R., Whitney, B.M., 1998. Use of vocalizations to establish species limits in  
819 antbirds (Passeriformes: Thamnophilidae). *The Auk* 115, 577-590.  
820 10.2307/4089407.
- 821 Isler, M.L., Rodrigues Lacerda, D., Isler, P.R., Hackett, S.J., Rosenberg, K.V., Brumfield, R.T., 2006.  
822 *Epinecrophylla*, a new genus of antwrens (Aves: Passeriformes: Thamnophilidae).  
823 *Proc Biol Soc Wash* 119, 522-527.
- 824 Isler, M.L., Whitney, B.M., 2018. Reevaluation of the taxonomic positions of members of the  
825 *Epinecrophylla fjeldsaai* (Aves: Passeriformes: Thamnophilidae) antwren complex  
826 including *E. fjeldsaai* based on vocalizations. *The Wilson Journal of Ornithology*  
827 130, 908-914.
- 828 Jombart, T., Ahmed, I., 2011. adegenet 1.3-1: new tools for the analysis of genome-wide SNP  
829 data. *Bioinformatics* 27, 3070-3071. 10.1093/bioinformatics/btr521.
- 830 Jombart, T., Devillard, S., Balloux, F., 2010. Discriminant analysis of principal components: a  
831 new method for the analysis of genetically structured populations. *BMC Genetics*  
832 11, 94. 10.1186/1471-2156-11-94.
- 833 Katoh, K., Misawa, K., Kuma, K., Miyata, T., 2002. MAFFT: a novel method for rapid multiple  
834 sequence alignment based on fast Fourier transform. *Nucleic Acids Research* 30,  
835 3059-3066. 10.1093/nar/gkf436.
- 836 Katoh, K., Standley, D.M., 2013. MAFFT multiple sequence alignment software version 7:  
837 improvements in performance and usability. *Mol Biol Evol* 30, 772-780.  
838 10.1093/molbev/mst010.
- 839 Krabbe, N., Isler, M.L., Isler, P.R., Whitney, B.M., Alvarez A., J., Greenfield, P.J., 1999. A new  
840 species in the *Myrmotherula haematonota* superspecies (Aves; Thamnophilidae)  
841 from the western Amazonian lowlands of Ecuador and Peru. *The Wilson Bulletin* 111, 157-165.
- 842 Lerner, H.R., Meyer, M., James, H.F., Hofreiter, M., Fleischer, R.C., 2011. Multilocus resolution  
843 of phylogeny and timescale in the extant adaptive radiation of Hawaiian  
844 honeycreepers. *Curr Biol* 21, 1838-1844. 10.1016/j.cub.2011.09.039.
- 845 Li, H., Durbin, R., 2009. Fast and accurate short read alignment with Burrows–Wheeler  
846 transform. *Bioinformatics* 25, 1754-1760. 10.1093/bioinformatics/btp324.
- 847 Li, H., Handsaker, B., Wysoker, A., Fennell, T., Ruan, J., Homer, N., Marth, G., Abecasis, G.,  
848 Durbin, R., Subgroup, G.P.D.P., 2009. The Sequence Alignment/Map format and  
849 SAMtools. *Bioinformatics* 25, 2078-2079. 10.1093/bioinformatics/btp352.
- 850 Mayr, E., 1942. Systematics and the origin of species. Columbia University Press, New York.

- 851 McKenna, A., Hanna, M., Banks, E., Sivachenko, A., Cibulskis, K., Kernytsky, A., Garimella, K.,  
852 Altshuler, D., Gabriel, S., Daly, M., DePristo, M.A., 2010. The Genome Analysis  
853 Toolkit: a MapReduce framework for analyzing next-generation DNA sequencing  
854 data. *Genome research* 20, 1297-1303. 10.1101/gr.107524.110.
- 855 Meirmans, P.G., 2015. Seven common mistakes in population genetics and how to avoid them.  
856 *Mol Ecol* 24, 3223–3231.
- 857 Meyer de Schauensee, R., 1970. A guide to the birds of South America. Livingston Publishing  
858 Company, Wynnewood, Pennsylvania.
- 859 Musher, L.J., Cracraft, J., 2018. Phylogenomics and species delimitation of a complex radiation  
860 of Neotropical suboscine birds (*Pachyramphus*). *Mol Phylogenet Evol* 118, 204-  
861 221. 10.1016/j.ympev.2017.09.013.
- 862 Nabholz, B., Lanfear, R., Fuchs, J., 2016. Body mass-corrected molecular rate for bird  
863 mitochondrial DNA. *Mol Ecol* 25, 4438-4449. 10.1111/mec.13780.
- 864 Paradis, E., Schliep, K., 2018. ape 5.0: an environment for modern phylogenetics and  
865 evolutionary analyses in R. *Bioinformatics*.
- 866 Parker, T.A., III, Remsen, J.V., Jr., 1987. Fifty-two Amazonian bird species new to Bolivia. *Bull.*  
867 *B.O.C.* 107, 94-107.
- 868 Pelzeln, A.v., Natterer, J., 1871. Zur ornithologie Brasiliens: resultate von Johann Natterers  
869 reisen in den jahren 1817 bis 1835. Wien: A. Pichler's Witwe & Sohn.
- 870 Peters, J.L., 1951. Check-list of birds of the world, vol. 7. . Museum of Comparative Zoölogy,  
871 Cambridge, Massachusetts.
- 872 Pritchard, J.K., Stephens, M., Donnelly, P., 2000. Inference of population structure using  
873 multilocus genotype data. *Genetics* 155, 945–959.
- 874 Rambaut, A., 2009. FigTree v1.4.4. Available via <http://tree.bio.ed.ac.uk/software/figtree/>.  
875 Accessed 25/11/2018.
- 876 Rambaut, A., Drummond, A.J., Xie, D., Baele, G., Suchard, M.A., 2018. Posterior summarization  
877 in Bayesian phylogenetics using Tracer 1.7. *Syst Biol* 67, 901-904.  
878 10.1093/sysbio/syy032.
- 879 Ratnasingham, S., Hebert, P.D.N., 2007. BOLD: The Barcode of Life Data System  
880 (<http://www.barcodinglife.org>). *Molecular Ecology Notes* 7, 355-364.  
881 10.1111/j.1471-8286.2007.01678.x.
- 882 Remsen, J.V., Jr., Areta, J.I., Bonaccorso, E., Claramunt, S., Jaramillo, A., Pacheco, J.F., Ribas, C.,  
883 Robbins, M.B., Stiles, F.G., Stotz, D.F., Zimmer, K.J., 2019. A classification of the  
884 bird species of South America. American Ornithological Society.  
885 <http://www.museum.lsu.edu/~Remsen/SACCBaseline.htm>.
- 886 Remsen, J.V., Jr., Parker, T.A., III, 1984. Arboreal dead-leaf searching birds of the Neotropics.  
887 *The Condor* 86, 36-41.
- 888 Ridgely, R.S., Tudor, G., 1994. The birds of South America. Vol II. The suboscine passerines.  
889 University of Texas Press, Austin, Texas.
- 890 Salaman, P.G.W., Stiles, F.G., Isabel Bohórquez, C., Álvarez-R., M., María Umaña, A., Donegan,  
891 T.M., Cuervo, A.M., 2002. New and noteworthy bird records from the east slope  
892 of the Andes of Colombia. *Caldasia* 24, 157-189.
- 893 Schulenberg, T.S., Stotz, D.F., Lane, D.F., O'Neill, J.P., Parker, T.A.I., 2007. Birds of Peru.  
894 Princeton University Press, Princeton, New Jersey.

- 895 Stamatakis, A., 2014. RAxML version 8: a tool for phylogenetic analysis and post-analysis of  
896 large phylogenies. *Bioinformatics* 30, 1312-1313.  
897 10.1093/bioinformatics/btu033.
- 898 Swofford, D.L., 1999. *Phylogenetic Analysis Using Parsimony, PAUP\* 4.0*, b166. Sinauer  
899 Associates, Boston, Massachusetts.
- 900 Tan, H.Z., Ng, E.Y.X., Tang, Q., Allport, G.A., Jansen, J., Tomkovich, P.S., Rheindt, F.E., 2019.  
901 Population genomics of two congeneric Palaearctic shorebirds reveals  
902 differential impacts of Quaternary climate oscillations across habitats types. *Sci*  
903 *Rep* 9, 18172. 10.1038/s41598-019-54715-9.
- 904 Todd, W.E.C., 1927. New gnateaters and antbirds from tropical America, with a revision of the  
905 genus *Myrmeciza* and its allies. *Proc. Biol. Soc. Washington* 40, 149-177.
- 906 Tuomisto, H., Van doninck, J., Ruokolainen, K., Moulatlet, G.M., Figueiredo, F.O.G., Sirén, A.,  
907 Cárdenas, G., Lehtonen, S., Zuquim, G., 2019. Discovering floristic and  
908 geoeological gradients across Amazonia. *Journal of Biogeography* 46, 1734-  
909 1748. 10.1111/jbi.13627.
- 910 Wallace, A.R., 1854. On the Monkeys of the Amazon. *Journal of Natural History Series* 2 14,  
911 451-454. 10.1080/037454809494374.
- 912 Weir, B.S., Cockerham, C.C., 1984. Estimating F-statistics for the analysis of population  
913 structure. *Evolution* 38, 1358-1370.
- 914 Whitney, B.M., 1994. Behavior, vocalizations, and possible relationships of four *Myrmotherula*  
915 antwrens (Formicariidae) from eastern Ecuador. *The Auk* 111, 469-475.
- 916 Whitney, B.M., Isler, M.L., Bravo, G.A., Aristizábal, N., Schunck, F., Fábio Silveira, L., de Q.  
917 Piacentini, V., 2013. A new species of *Epinecrophylla* antwren from the Aripuanã-  
918 Machado interfluvium in central Amazonian Brazil with revision of the “stipple-  
919 throated antwren” complex. *Handbook of the birds of the World, original*  
920 *scientific descriptions*, 263-267.
- 921 Wiley, R.H., 1971. Cooperative roles in mixed flocks of antwrens (Formicariidae). *The Auk* 88,  
922 881-892.
- 923 Zarza, E., Faircloth, B.C., Tsai, W.L., Bryson, R.W., Jr., Klicka, J., McCormack, J.E., 2016. Hidden  
924 histories of gene flow in highland birds revealed with genomic markers. *Mol Ecol*  
925 25, 5144-5157. 10.1111/mec.13813.
- 926 Zimmer, J.T., 1932a. *Studies of Peruvian Birds. III. The genus Myrmotherula in Peru, with notes*  
927 *on extralimital forms. Part 1. American Museum Novitates* 523, 1-19.
- 928 Zimmer, J.T., 1932b. *Studies of Peruvian Birds. IV. The genus Myrmotherula in Peru, with notes*  
929 *on extralimital forms. Part 2. American Museum Novitates* 524, 1-16.
- 930 Zimmer, K.J., Isler, M.L., 2003. Family *Thamnophilidae* (typical antbirds). In: del Hoyo, J., Elliott,  
931 A., Christie, D.A. (Eds.), *Handbook of the Birds of the World*. Lynx Edicions,  
932 Barcelona, pp. 448-681.
- 933 Zucker, M.R., Harvey, M.G., Oswald, J.A., Cuervo, A., Derryberry, E., Brumfield, R.T., 2016. The  
934 Mouse-colored Tyrannulet (*Phaeomyias murina*) is a species complex that  
935 includes the Cocos Flycatcher (*Nesotriccus ridgwayi*), an island form that  
936 underwent a population bottleneck. *Mol Phylogenet Evol* 101, 294-302.  
937 10.1016/j.ympev.2016.04.031.  
938

939

940 Table 1. Localities for samples used in this project. Abbreviations are as follows: LSUMNS =  
941 Louisiana State University Museum of Natural Science, KU = University of Kansas Biodiversity  
942 Institute & Natural History Museum, AMNH = American Museum of Natural History, MZUSP =  
943 Museum of Zoology of the University of São Paulo, FMNH = Field Museum of Natural History,  
944 MSB = Museum of Southwestern Biology, USNM = Smithsonian National Museum of Natural  
945 History, YPM = Yale Peabody Museum. Probe set refers to the probe set used in sequencing. 5k  
946 = Tetrapods-UCE-5Kv1 probe set targeting 5,060 loci, and sequenced for this study. 2.5k =  
947 Tetrapods-UCE-2.5Kv1 probe set targeting 2,386 loci, sequences obtained from Harvey et al. (in  
948 press).

949

950

951

952

953

954

955

956

957

958

| Sample # | Taxon                                      | Tissue #     | Probe set | Locality                                                                            | Latitude | Longitude |
|----------|--------------------------------------------|--------------|-----------|-------------------------------------------------------------------------------------|----------|-----------|
| 1        | <i>Epinecrophylla fulviventris</i>         | LSUMNS 82086 | 5k        | Costa Rica: Limón; Reserva Biológica Hitoy-Cerere                                   | 9.65     | -83.01    |
| 2        | <i>E. fulviventris</i>                     | LSUMNS 2299  | 2.5k      | Panamá: Darién; Cana                                                                | 7.92     | -77.70    |
| 3        | <i>E. ornata atrogularis</i>               | MSB 36505    | 5k        | Perú: San Martín; ca 2.7 km S of Plataforma                                         | -7.41    | -76.27    |
| 4        | <i>E. ornata atrogularis</i>               | LSUMNS 74213 | 2.5k      | Perú: Pasco; Provincia Oxapampa, Distrito Puerto Bermúdez, Comunidad San Juan       | -10.50   | -74.81    |
| 5        | <i>E. ornata hoffmannsi</i>                | LSUMNS 78113 | 2.5k      | Brazil: Amazonas; Barra de São Manuel                                               | -7.50    | -58.26    |
| 6        | <i>E. ornata hoffmannsi</i>                | FMNH 391379  | 5k        | Brazil: Pará; Serra dos Carajás                                                     | -6.28    | -50.58    |
| 7        | <i>E. ornata hoffmannsi</i>                | FMNH 457051  | 5k        | Brazil: Pará; Portel, FLONA do Caxiuanã, Plot PPBIO                                 | -2.53    | -50.85    |
| 8        | <i>E. ornata meridionalis</i>              | LSUMNS 9502  | 5k        | Bolivia: Pando; Nicolás Suarez, 12 km by road S of Cobija, 8 km W on road to Mucden | -11.16   | -68.78    |
| 9        | <i>E. ornata meridionalis</i>              | LSUMNS 1082  | 5k        | Bolivia: La Paz; Río Beni, ca 20 km by river N Puerto Linares                       | -15.28   | -67.50    |
| 10       | <i>E. ornata meridionalis</i>              | LSUMNS 78808 | 5k        | Perú: Madre de Dios; Portillo, ca 7 km S Iberia                                     | -11.45   | -69.52    |
| 11       | <i>E. erythrura erythrura</i>              | ANSP 16560   | 2.5k      | Ecuador: Morona-Santiago; Santiago                                                  | -2.72    | -78.32    |
| 12       | <i>E. erythrura septentrionalis</i>        | LSUMNS 27716 | 5k        | Perú: Loreto; 79 km WNW Contamana                                                   | -7.15    | -75.69    |
| 13       | <i>E. leucophthalma leucophthalma west</i> | LSUMNS 42670 | 5k        | Perú: Loreto; ca 54 km NNW mouth of Río Morona on W bank                            | -4.29    | -77.24    |



|           |                                            |                 |      |                                                                                              |        |        |
|-----------|--------------------------------------------|-----------------|------|----------------------------------------------------------------------------------------------|--------|--------|
| <b>14</b> | <i>E. leucophthalma leucophthalma west</i> | LSUMNS<br>10538 | 5k   | Perú: Ucayali; W bank Río Shesha, 65 km ENE Pucallpa                                         | -7.95  | -74.25 |
| <b>15</b> | <i>E. leucophthalma leucophthalma west</i> | LSUMNS 9173     | 5k   | Bolivia: Pando; Nicolás Suarez, 12 km by road S of Cobija, 8 km W on road to Mucden          | -11.16 | -68.78 |
| <b>16</b> | <i>E. leucophthalma leucophthalma west</i> | LSUMNS<br>75006 | 5k   | Perú: Ucayali; Otorongo, 31.9 km ESE mouth of Río Cohengua                                   | -10.38 | -73.72 |
| <b>17</b> | <i>E. leucophthalma sordida</i>            | FMNH 392048     | 5k   | Brazil: Mato Grosso do Norte; Municipio Alta Floresta, upper Rio Teles Pires-Rio Cristalino  | -9.63  | -55.93 |
| <b>18</b> | <i>E. leucophthalma sordida</i>            | FMNH 457026     | 5k   | Brazil: Pará; Portel, FLONA do Caxiuanã, Plot PPBIO                                          | -2.53  | -50.85 |
| <b>19</b> | <i>E. leucophthalma leucophthalma east</i> | FMNH 389907     | 5k   | Brazil: Rondônia; Cachoeira Nazaré, W bank Río Jiparaná                                      | -10.36 | -61.82 |
| <b>20</b> | <i>E. leucophthalma leucophthalma east</i> | LSUMNS<br>36628 | 5k   | Brazil: Rondônia; Reserva Biológica Rebid Duro Preto, ca 70 km E Guajará-Mirim               | -10.80 | -64.69 |
| <b>21</b> | <i>E. leucophthalma leucophthalma east</i> | LSUMNS<br>18242 | 2.5k | Bolivia: Santa Cruz; Provincia Velasco; PN Noel Kempff Mercado, 86 km ESE Florida            | -14.85 | -60.46 |
| <b>22</b> | <i>E. leucophthalma leucophthalma east</i> | LSUMNS<br>14575 | 5k   | Bolivia: Santa Cruz; Serranía de Huanchaca, 21 km SE Catarata Arco Iris                      | -13.92 | -60.82 |
| <b>23</b> | <i>E. leucophthalma leucophthalma east</i> | LSUMNS<br>12394 | 5k   | Bolivia: Santa Cruz; Provincia Velasco, 32 km E Aserradero Moira, pre PN Noel Kempff Mercado | -14.60 | -60.92 |
| <b>24</b> | <i>E. leucophthalma phaeonota</i>          | LSUMNS<br>85998 | 5k   | Brazil: Amazonas; Río Sucunduri                                                              | -6.89  | -59.07 |
| <b>25</b> | <i>E. leucophthalma phaeonota</i>          | LSUMNS<br>78380 | 5k   | Brazil: Amazonas; Río Juruena                                                                | -11.05 | -58.65 |
| <b>26</b> | <i>E. leucophthalma phaeonota</i>          | LSUMNS<br>77807 | 5k   | Brazil: Amazonas; Barra de São Manuel, W bank Río Tapajós                                    | -7.34  | -58.09 |
| <b>27</b> | <i>E. leucophthalma phaeonota</i>          | LSUMNS<br>80818 | 5k   | Brazil: Amazonas; right bank of Río Sucunduri, Igarapé da Cabaça                             | -5.70  | -59.16 |

|           |                                   |                 |      |                                                                                                     |       |        |
|-----------|-----------------------------------|-----------------|------|-----------------------------------------------------------------------------------------------------|-------|--------|
| <b>28</b> | <i>E. leucophthalma phaeonota</i> | LSUMNS<br>35603 | 5k   | Brazil: Pará; ca 139 km WSW Santarém, W of<br>Río Tapajós, Alto Río Arapiuns                        | -3.60 | -55.52 |
| <b>29</b> | <i>E. leucophthalma phaeonota</i> | LSUMNS<br>80774 | 5k   | Brazil: Amazonas; left bank of Río Sucunduri,<br>left bank lower Río Acari (7 km from its<br>mouth) | -7.15 | -59.91 |
| <b>30</b> | <i>E. gutturalis</i>              | AMNH 12689      | 5k   | Venezuela: Amazonas; Cerro de La Neblina<br>base camp                                               | 1.3   | -66.5  |
| <b>31</b> | <i>E. gutturalis</i>              | YPM 139781      | 5k   | Suriname: upper West River Valley,<br>Wilhelmina Mountains                                          | 3.75  | -56.50 |
| <b>32</b> | <i>E. gutturalis</i>              | LSUMNS<br>71576 | 5k   | Suriname: Sipaliwini; Nassau Bebergte                                                               | 4.78  | -54.60 |
| <b>33</b> | <i>E. gutturalis</i>              | KU 88804        | 5k   | Guyana: Iwokrama Reserve, W bank<br>Essequibo River, ca 72 river km SW<br>Kurupukari                | 4.22  | -59.17 |
| <b>34</b> | <i>E. gutturalis</i>              | KU 88801        | 5k   | Guyana: Iwokrama Reserve, ca 41 road km<br>SW Kurupukari                                            | 4.34  | -58.85 |
| <b>35</b> | <i>E. gutturalis</i>              | USNM 609157     | 5k   | Guyana: Essequibo Islands; West Demerara,<br>Waruma River, E bank, ca 15 river km S Kako<br>River   | 5.5   | -60.6  |
| <b>36</b> | <i>E. gutturalis</i>              | USNM 586379     | 5k   | Guyana: Northwest District; Baramita                                                                | 7.35  | -60.35 |
| <b>37</b> | <i>E. gutturalis</i>              | AMNH 11921      | 5k   | Venezuela: Bolívar                                                                                  | 6.2   | -63.6  |
| <b>38</b> | <i>E. gutturalis</i>              | YPM 137211      | 5k   | Suriname: Sipaliwini; Werehpai                                                                      | 3.65  | -56.20 |
| <b>39</b> | <i>E. gutturalis</i>              | LSUMNS<br>20398 | 2.5k | Brazil: Amazonas; Manaus, km 34 ZF-3 Faz<br>Esteio ca 80 km N Manaus                                | -2.44 | -59.89 |
| <b>40</b> | <i>E. gutturalis</i>              | LSUMNS<br>55218 | 2.5k | Suriname: Sipaliwini; Balchuis Gebergte, ca<br>70 km SE Apura                                       | 4.73  | -56.75 |

|    |                                  |              |      |                                                                                     |        |        |
|----|----------------------------------|--------------|------|-------------------------------------------------------------------------------------|--------|--------|
| 41 | <i>E. gutturalis</i>             | USNM 587338  | 5k   | Guyana: Acari Mountains, N side                                                     | 2.05   | -57.55 |
| 42 | <i>E. gutturalis</i>             | YPM 139633   | 5k   | Suriname: Para District                                                             | 5.4    | -55.2  |
| 43 | <i>E. gutturalis</i>             | YPM 101670   | 5k   | Suriname: Tafelberg                                                                 | 3.78   | -56.15 |
| 44 | <i>E. amazonica dentei</i>       | MZUSP 80591  | 2.5k | Brazil: Amazonas; Río Roosevelt, Esperança                                          | -8.33  | -60.99 |
| 45 | <i>E. amazonica amazonica</i>    | LSUMNS 9217  | 2.5k | Bolivia: Pando; Nicolás Suarez, 12 km by road S of Cobija, 8 km W on road to Mucden | -11.20 | -68.78 |
| 46 | <i>E. amazonica amazonica</i>    | MZUSP J164   | 2.5k | Brazil: Rondônia; left bank Río Madeira, near mouth of Río Abunã                    | -9.63  | -65.45 |
| 47 | <i>E. amazonica amazonica</i>    | LSUMNS 31342 | 5k   | Brazil: Rondônia; ca 50 km NW Jaci Paraná, W bank of Río Madeira                    | -8.93  | -64.10 |
| 48 | <i>E. spodionota sororia</i>     | KU 113634    | 5k   | Perú: Cusco; ca Alto Manguriari                                                     | -13.53 | -71.97 |
| 49 | <i>E. spodionota sororia</i>     | LSUMNS 2058  | 5k   | Perú: Pasco; Puellas, km 41 on Villa Rica - Puerto Bermúdez highway                 | -10.29 | -74.94 |
| 50 | <i>E. spodionota sororia</i>     | LSUMZ 76377  | 5k   | Perú: Ucayali; north ridge of Quebrada Quirapokiari watershed                       | -10.45 | -74.12 |
| 51 | <i>E. spodionota spodionota</i>  | IAvH-BT 234  | 2.5k | Colombia: Cauca; Santa Rosa, Serranía de Los Churumbelos, Río Alto Hornoyaco        | 1.70   | -76.57 |
| 52 | <i>E. spodionota sororia</i>     | FMNH 474124  | 5k   | Perú: Amazonas; Río Verde                                                           | -6.72  | -77.43 |
| 53 | <i>E. spodionota sororia</i>     | LSUMNS 5392  | 5k   | Perú: San Martín; 20 km by road NE Tarapoto on road to Yurimaguas                   | -6.36  | -76.24 |
| 54 | <i>E. haematonota pyrrhonota</i> | LSUMNS 4202  | 2.5k | Perú: Loreto; Lower Río Napo region, E bank Río Yanayacu, ca 90 km N Iquitos        | -2.96  | -73.24 |

|                 |                                         |              |      |                                                                                       |        |        |
|-----------------|-----------------------------------------|--------------|------|---------------------------------------------------------------------------------------|--------|--------|
| 55              | <i>E. haematonota pyrrhonota</i>        | FMNH 457014  | 5k   | Brazil: Amazonas; Maraã, Lago Cumapi                                                  | -1.68  | -65.83 |
| 56              | <i>E. haematonota pyrrhonota</i>        | AMNH 14224   | 5k   | Brazil: Amazonas; Estrada Manacapuru-Novo Airão km 75                                 | -3.29  | -60.63 |
| 57              | <i>E. haematonota pyrrhonota</i>        | MZUSP 79027  | 2.5k | Brazil: Roraima; Paracaima, Comunidade Nova Esperança                                 | 4.43   | -61.13 |
| 58              | <i>E. haematonota pyrrhonota</i>        | LSUMNS 7505  | 5k   | Venezuela: Amazonas; Cerro De La Neblina, Camp VII                                    | 0.88   | -65.99 |
| 59              | <i>E. haematonota haematonota</i>       | LSUMNS 75291 | 5k   | Perú: Ucayali; Otorongo, 31.9 km ESE mouth of Río Cohengua                            | -10.38 | -73.72 |
| 60              | <i>E. haematonota haematonota</i>       | LSUMNS 4579  | 2.5k | Perú: Loreto; S Río Amazonas, 10 km SSW mouth Río Napo on E bank Quebrada Vainilla    | -3.52  | -72.81 |
| 61              | <i>E. haematonota haematonota</i>       | LSUMNS 10790 | 5k   | Perú: Ucayali; W bank Río Shesha, 65 km ENE Pucallpa                                  | -7.94  | -74.23 |
| 62              | <i>E. haematonota fjeldsaai hybrid?</i> | LSUMNS 42704 | 5k   | Perú: Loreto; ca 54 km NNW mouth of Morona on W bank                                  | -4.29  | -77.24 |
| 63              | <i>E. haematonota fjeldsaai</i>         | KU 873       | 2.5k | Perú: Loreto; San Jacinto, 1.5 km E Río Tigre                                         | -2.32  | -75.86 |
| 64              | <i>E. haematonota haematonota</i>       | LSUMNS 93087 | 5k   | Perú: Loreto; Esperanza, E of Río Huallaga on Río Yuracyacu, 14.2 km E Santa Cruz     | -5.54  | -75.73 |
| 65              | <i>E. haematonota haematonota</i>       | LSUMNS 27427 | 5k   | Perú: Loreto; NE bank upper Río Cushabatay, 84 km WNW Contamana                       | -7.07  | -75.70 |
| 66              | <i>E. haematonota haematonota</i>       | LSUMNS 42282 | 5k   | Perú: Loreto; 7km SW Jeberos                                                          | -5.34  | -76.32 |
| <b>outgroup</b> | <i>Clytoctantes atrogularis</i>         | MZUSP 96888  | 2.5k | Brazil: Amazonas; Río Sucunduri (right bank) 60 km below BR-230 (point 9)             | -6.25  | -59.07 |
| <b>outgroup</b> | <i>Myrmorchilus strigilatus</i>         | LSUMNS 18722 | 5k   | Bolivia: Santa Cruz; Provincia Cordillera, Estancia Perforación, ca 130 km E Charagua | -19.78 | -61.97 |

---

|                                         |             |      |                                                            |       |        |
|-----------------------------------------|-------------|------|------------------------------------------------------------|-------|--------|
| <b>outgroup</b> <i>Neoctantes niger</i> | LSUMNS 2749 | 2.5k | Perú: Loreto; 1 km N Río Napo, 157 km by river NNE Iquitos | -3.39 | -73.18 |
|-----------------------------------------|-------------|------|------------------------------------------------------------|-------|--------|

---

959

960

961

962

963 FIGURES

964

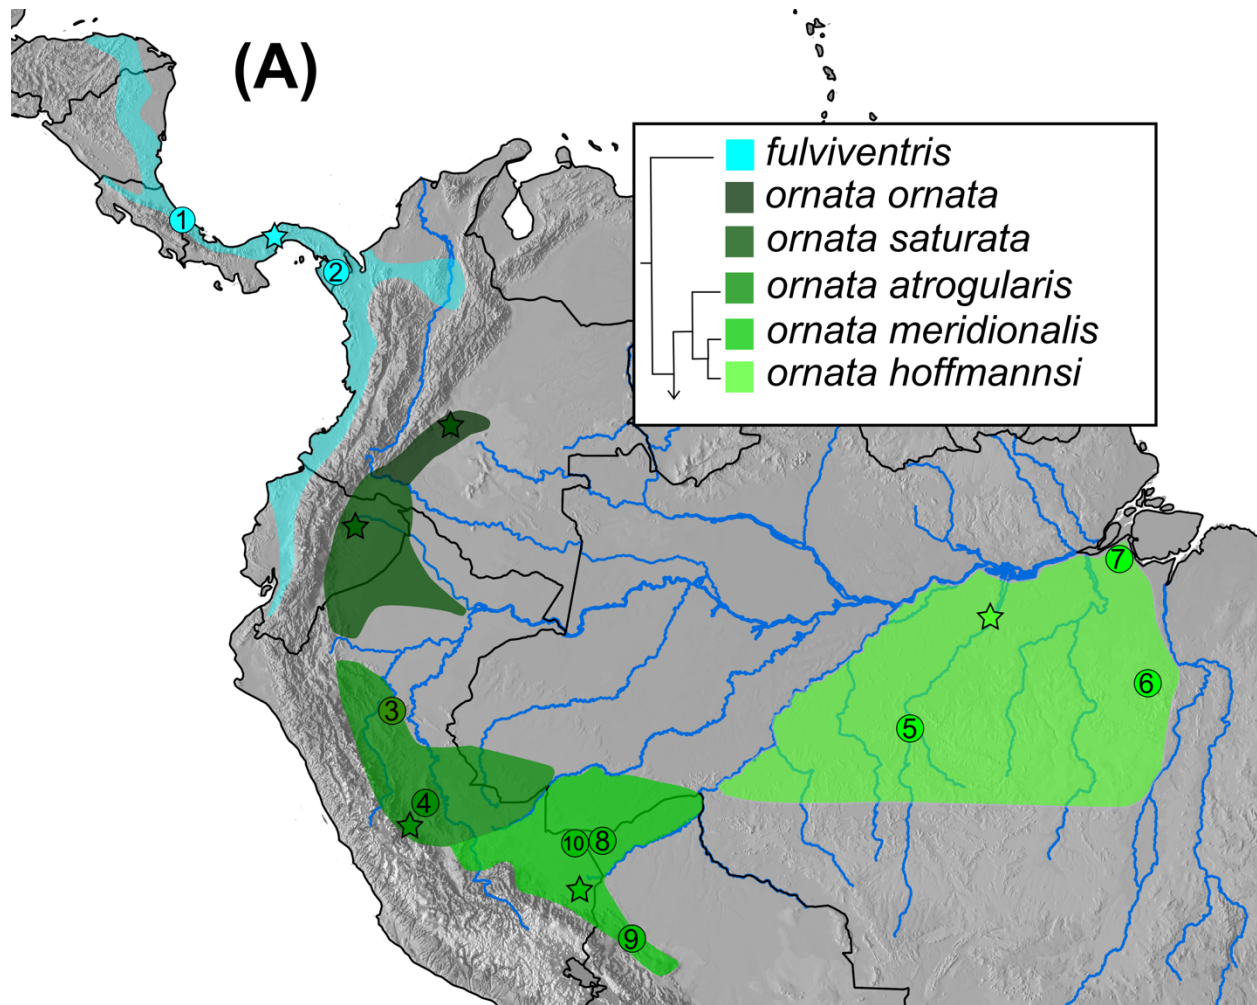

965

966

967

968

969

970

971

972

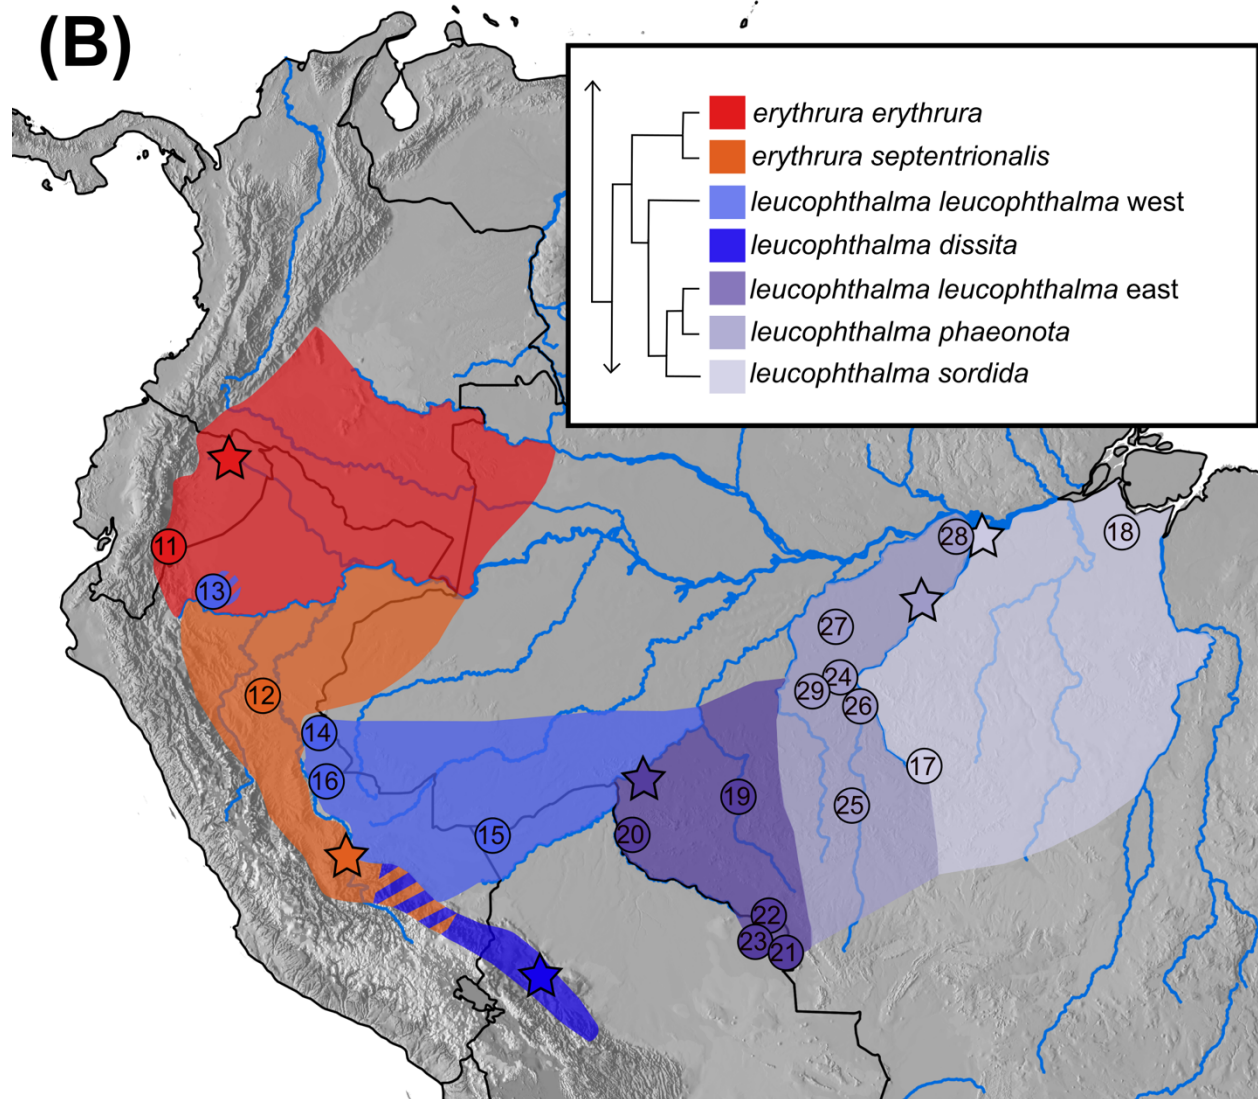

973

974

975

976

977

978

979

980

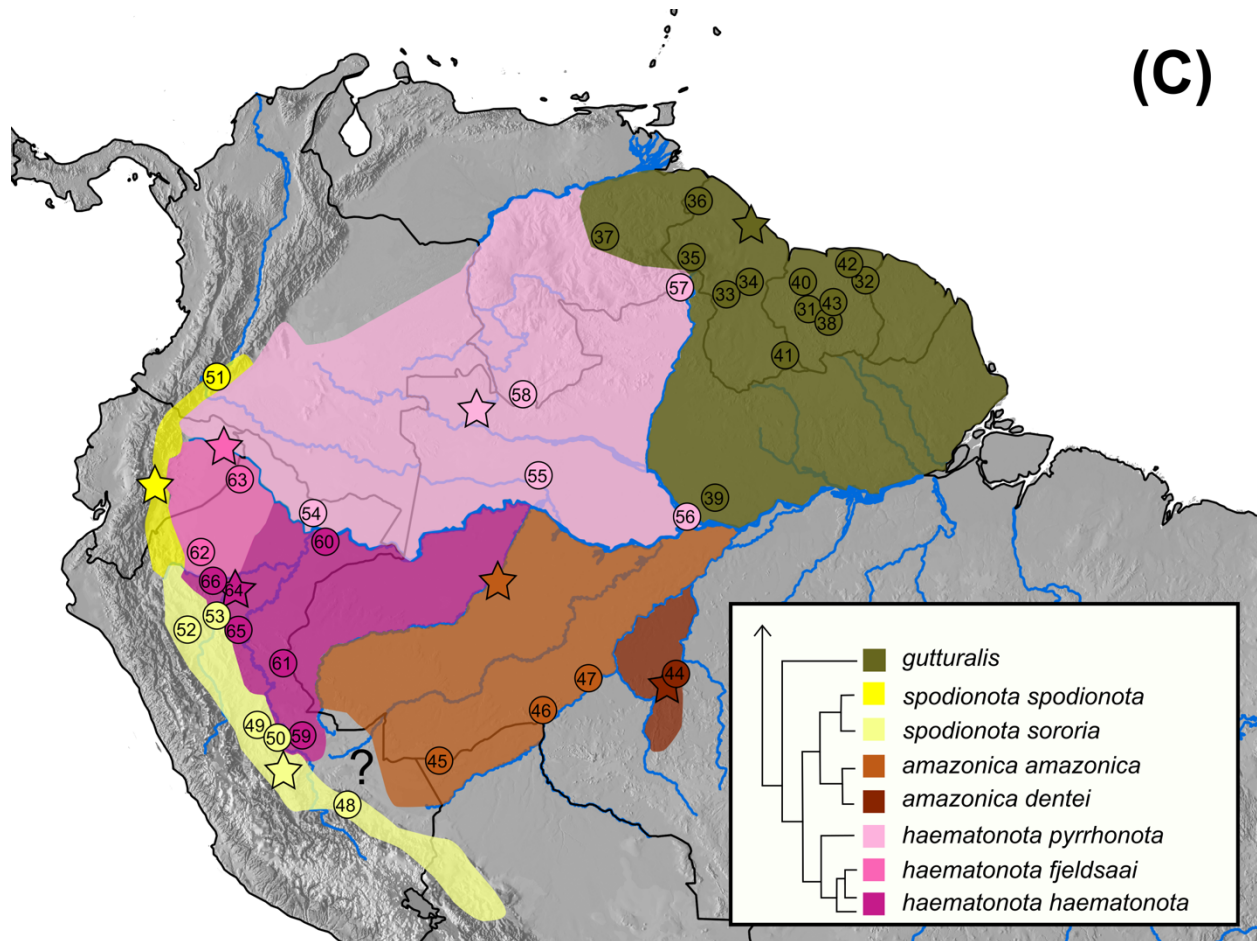

981

982

983 Figure 1. Maps showing taxon distributions, type localities, and sample localities used in this  
984 study. A) *Epinecrophylla fulviventris* and *ornata*. B) *E. erythrura* and *leucophthalma*. C) *E.*  
985 *gutturalis*, *pyrhnota*, *dentei*, *amazonica*, *spodionota*, *haematonota*, and *fjeldsaii*. Country  
986 boundaries are shown in black. Major rivers are shown in blue. Locations sampled for this study  
987 are indicated with a number, corresponding to sample information in Table 1. Type localities,  
988 shown with a star, are based on Peters (1951) or type descriptions. Hashed regions indicate  
989 range overlap. Inset for each map shows a cladogram of relationships between each taxon  
990 based on the trees in Figure 2 and Figure S1H.



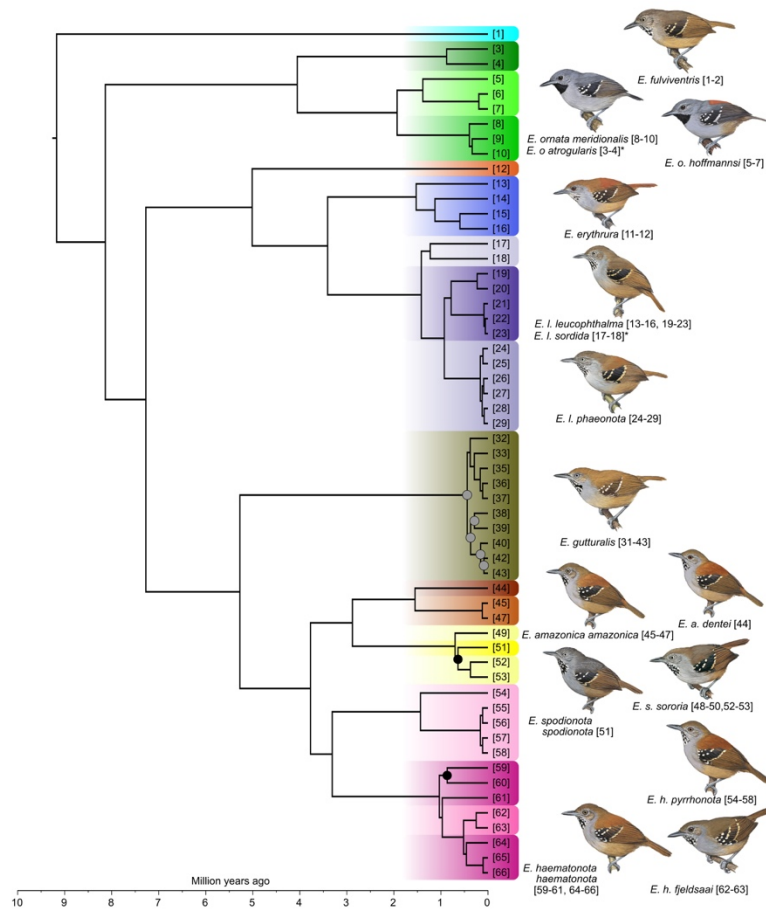

991

992 Figure 2. A dated phylogeny combining UCE and mitogenome sequence data. Topology

993 estimated in Exabayes from the 75% complete phased concatenated UCE data matrix and

994 branch lengths estimated in BEAST using the mitogenome alignments and a fixed substitution

995 rate (see section 2.6 for details). All nodes received full support unless marked with a circle.

996 Nodes with a gray circle with >0.75 posterior probability and nodes with a black circle with

997 >0.90 posterior probability. A version of this tree with 95% confidence intervals on node ages is

998 in Figure S3, and the phylogenetic tree estimated in Exabayes that contains all samples is in

999 Figure S1A. Outgroup samples have been removed for clarity. Colors and sample numbers

1000 correspond to those in Figure 1. Illustrations (all of males) reproduced by permission of Lynx

1001 Edicions. Taxa marked with an asterisk are not illustrated and are placed below the taxon they  
1002 most closely resemble in plumage.

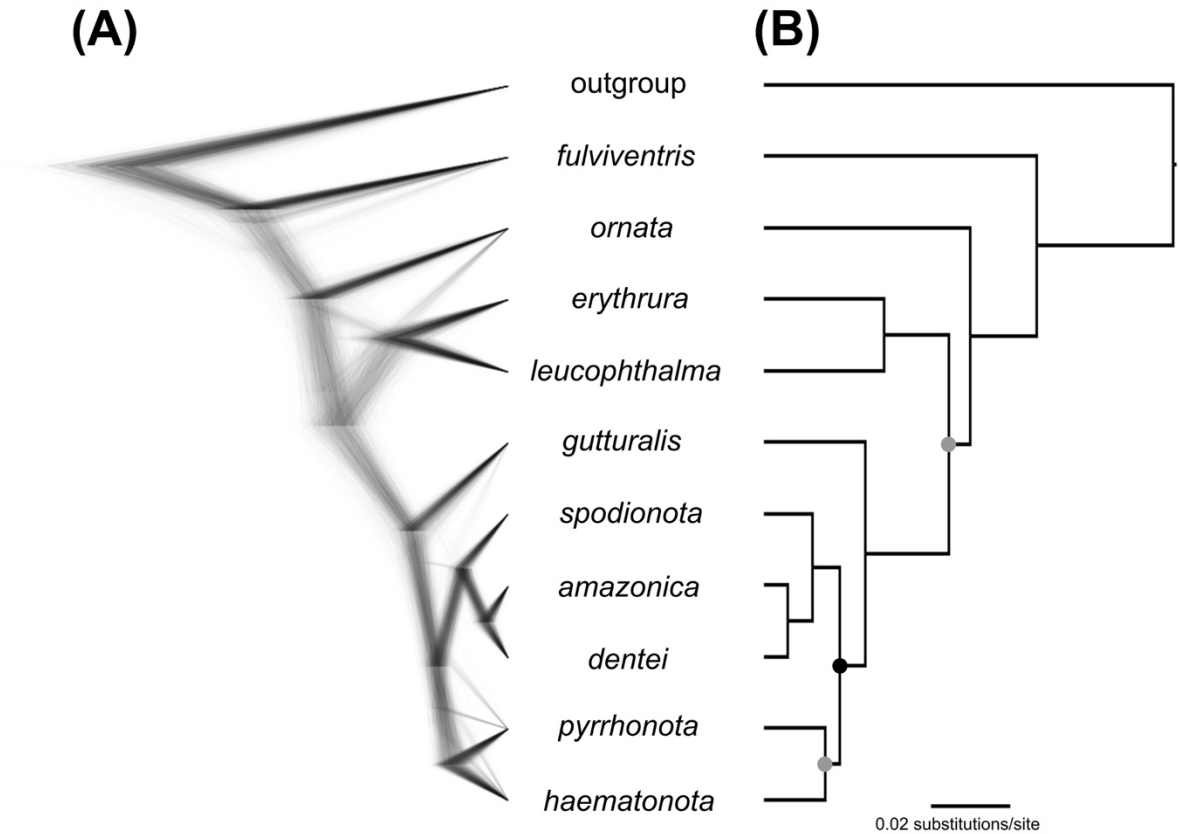

1003  
1004 Figure 3. Species tree estimated in SNAPP from SNP data, using one sample per species. A) The  
1005 Densitree representation of the posterior distribution of species trees and B) the Maximum  
1006 Clade Credibility species tree. All nodes received full support unless marked with a circle. Nodes  
1007 with a posterior probability >0.90 are marked with a black circle, and those with a posterior  
1008 probability >0.75 are marked with a gray circle.

1009

1010

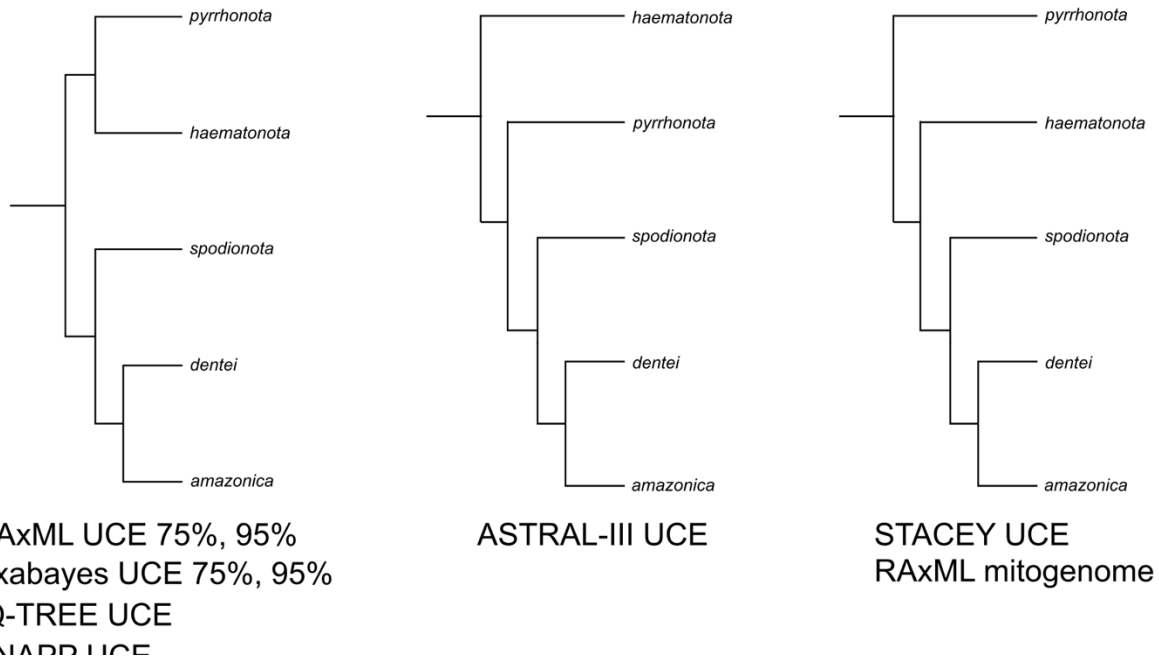

1011

1012

1013 Figure 4. Alternate topologies recovered across phylogenetic methods for relationships within  
1014 the *Epinecrophylla haematonota s.l.* clade. Results are shown using a single individual per taxon  
1015 for visualization purposes. In all cases *E. haematonota fjeldsai* was recovered as embedded  
1016 within *E. h. haematonota* and is not shown. The methods recovering each topology are shown  
1017 below the topology, and the full phylogenies using each method are in Figure S1.

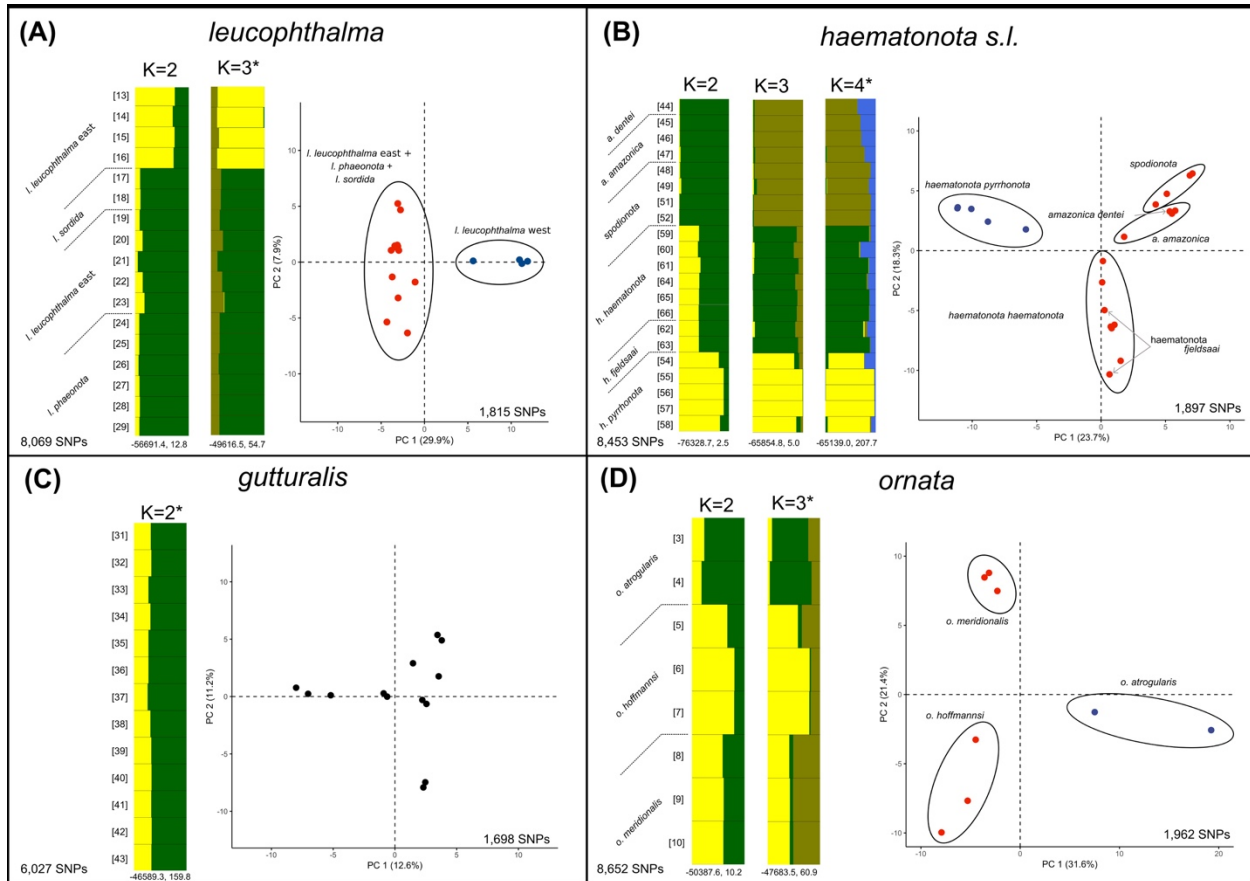

1018

1019

1020 Figure 5. Intra-specific population genetic analyses. A) *Epinecrophylla leucophthalma*, B) the *E.*

1021 *haematonota s.l.* clade, containing *dentei*, *amazonica*, *spodionota*, *sororia*, *pyrrhonota*,

1022 *haematonota*, and *fjeldsaai*, C) *E. gutturalis*, and D) *E. ornata*. For each section is shown a

1023 Principal Components Analysis (PCA) with samples colored by the Discriminant Analysis of

1024 Principal Components Analysis (DAPC) group assignments on the right, and STRUCTURE plots

1025 for all likely values of K (i.e. those with low standard deviation across replicate runs) on the left.

1026 Not shown are results for K=1. The plot for the “best” value of K for each clade using the

1027 Evanno method is marked with an asterisk. Mean log likelihood and delta K values are shown

1028 below each STRUCTURE plot. Sample size in PCA plots refer to the number of unlinked SNPs

1029 recovered in that clade and used in the PCA analysis. Blue and red circles denote group  
1030 assignments from DAPC while black circles and text denote taxa. Sample numbers correspond  
1031 to those in Figure 1 and Table 1. PCAs with sample numbers included are shown in Figure S5.

1032

### 1033 SUPPLEMENTAL CAPTIONS

1034

1035 Supplemental Table 1. Samples removed from analyses due to misidentification or potential  
1036 contamination.

1037

1038 Supplemental Table 2. Samples for which we were unable to recover mitochondrial genomes  
1039 either due to a failure with MITOBIM or very high amounts of missing data in the recovered  
1040 mitochondrial genome.

1041

1042 Supplemental Table 3. Matrix of mitochondrial genetic distances between taxa in this study.  
1043 Values above the diagonal represent the uncorrected  $p$ -distance and those below the diagonal  
1044 represent the genetic distance accounting for multiple substitutions under the GTR +  $\gamma$  + I finite-  
1045 sites substitution model. Values in the diagonal represent the average intra-taxon distance for  
1046 the finite-sites distance (left) and the uncorrected  $p$ -distance (right). Both distance methods are  
1047 based on the concatenated alignment of the 13 mitochondrial protein coding genes. All values  
1048 are shown as a percentage.

1049

1050 Supplemental Table 4. Matrix of nuclear genetic distances between taxa in this study. Values  
1051 below the diagonal are the weighted value of  $F_{st}$  between taxa, averaged across UCE loci.  
1052 Values in the diagonal represent the average intra-taxon distance.  
1053  
1054 Supplemental Table 5. Individuals used as references for SNP calling.  
1055  
1056 Supplemental Figure 1. Seven estimates of the phylogeny of *Epinecrophylla*, based on UCE  
1057 alignments, showing congruence of internal topologies across methods. A) Exabayes tree  
1058 estimated from the 75% complete concatenated data matrix (note that this tree is also shown  
1059 in Figure 2), with node support values of posterior probability. B) Exabayes tree estimated from  
1060 the 95% complete concatenated data matrix, with node support values of posterior probability.  
1061 C) RAxML tree estimated from the 75% complete concatenated data matrix, with node support  
1062 values of bootstrap likelihood. D) RAxML tree estimated from the 95% complete concatenated  
1063 data matrix, with node support values of bootstrap likelihood. E) STACEY tree estimated from  
1064 the fully-partitioned alignment using the 150 loci containing the greatest number of parsimony-  
1065 informative sites, with node support values of posterior probability. F) ASTRAL-III tree  
1066 estimated from RAxML gene trees using the 75% complete data matrix, with node quartet  
1067 support values of local posterior probability. G) IQ-TREE estimated from the 75% complete data  
1068 matrix. Node support values shown in ultrafast bootstrap likelihood, gene tree concordance  
1069 factors, and site concordance factors, respectively.  
1070

1071 Supplemental Figure 2. An estimate of the phylogeny of *Epinecrophylla*, based on an alignment  
1072 of draft mitochondrial genomes using a Maximum Likelihood methodology implemented in  
1073 RAxML, with node support values of bootstrap likelihood.

1074

1075 Supplemental Figure 3. The dated phylogeny shown in Figure 1, with nodes showing the 95%  
1076 highest posterior density of the divergence estimates based on 11,488 base pairs of the draft  
1077 mitochondrial genomes and a fixed mitochondrial substitution rate.

1078

1079 Supplemental Figure 4. Species tree estimated in SNAPP from SNP data, using 1-2 samples per  
1080 clade. A) The Densitree representation of the posterior distribution of species trees and B) the  
1081 Maximum Clade Credibility species tree. All nodes received full support unless marked with a  
1082 circle. Nodes with a posterior probability between 0.90 and 0.75 are marked with a gray circle  
1083 and those <0.75 are marked with a white circle. No nodes received a posterior probability  
1084 between 1 and 0.90. See Figure 3 for the SNAPP tree using one sample per species.

1085

1086 Supplemental Figure 5. PCA plots shown in Figure 5 with samples labeled by taxon and sample  
1087 number.

1088

1089 Supplemental Figure 6. PCA plot using four samples of *Epinecrophylla amazonica*. DAPC results  
1090 indicated a best fit model of K=2, separating the one sample of *dentei* from the three of  
1091 *amazonica*.

1092
